# Supplementary material for: Modelling the Role of the Hsp70/Hsp90 System in the Maintenance of Protein Homeostasis
Source: PubMed Central journal article supplement (PMC3137010; doi:10.1371/journal.pone.0022038), 2011-07-14

Set Number: 7

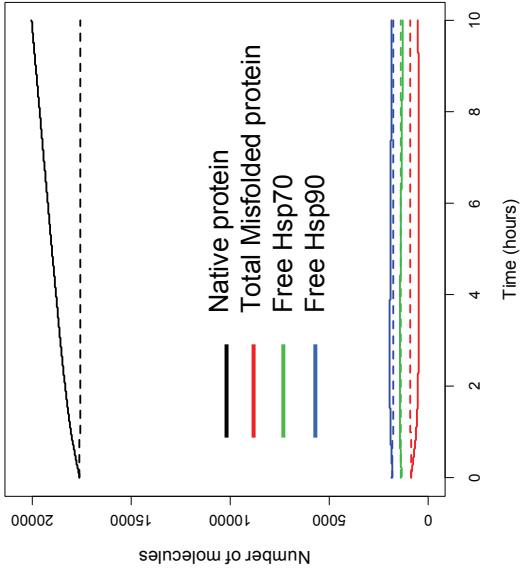

Set Number: 8

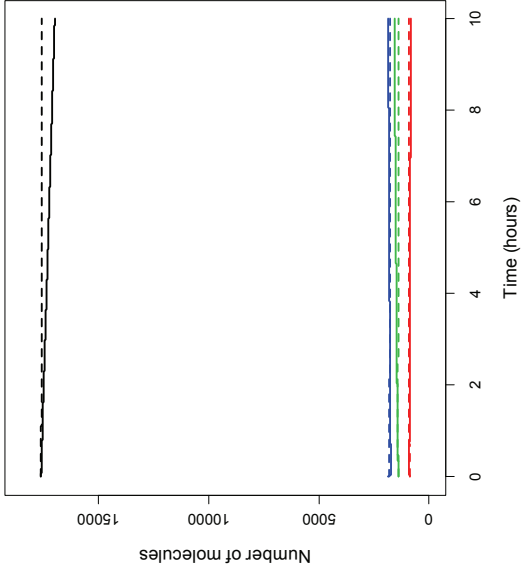

Set Number: 9

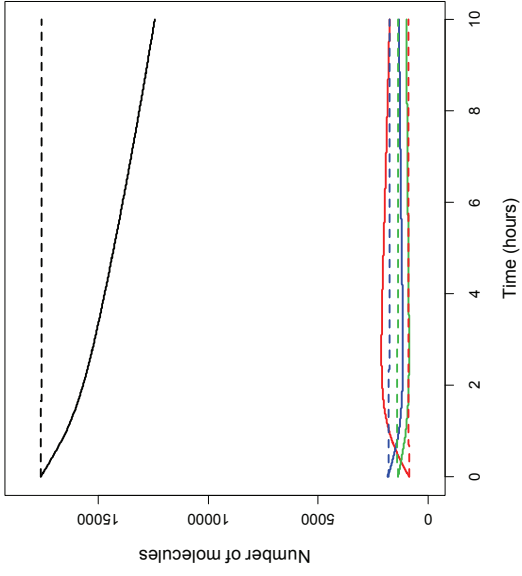

Set Number: 10

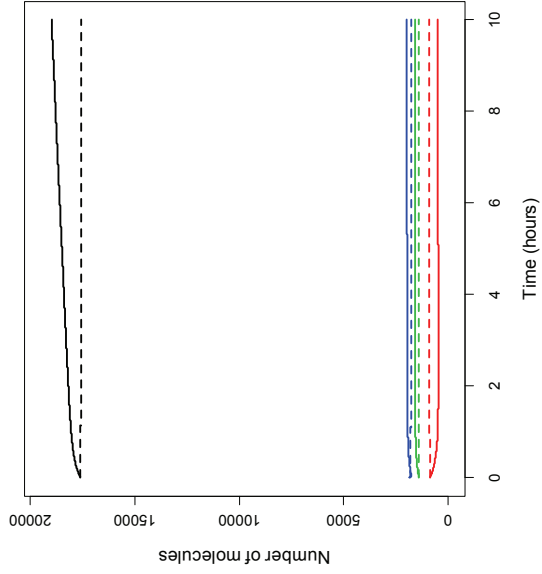

Set Number: 11

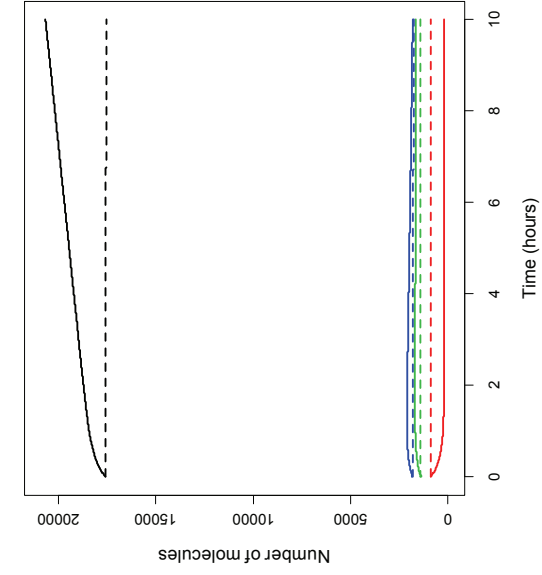

Set Number: 12

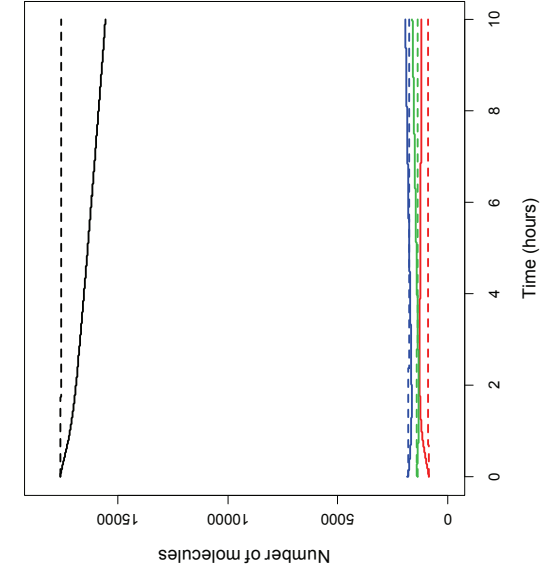

Set Number: 13

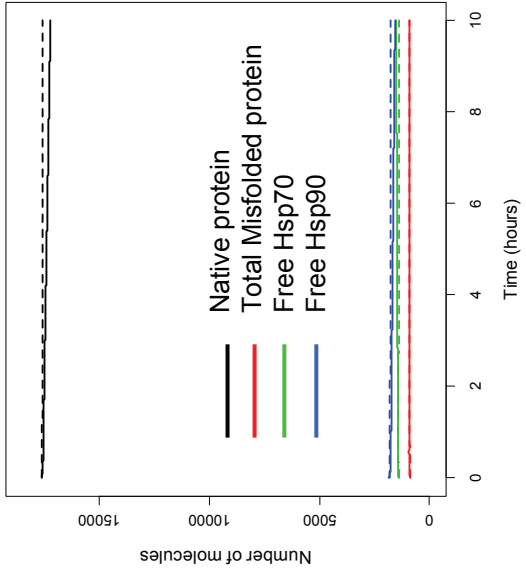

Set Number: 14

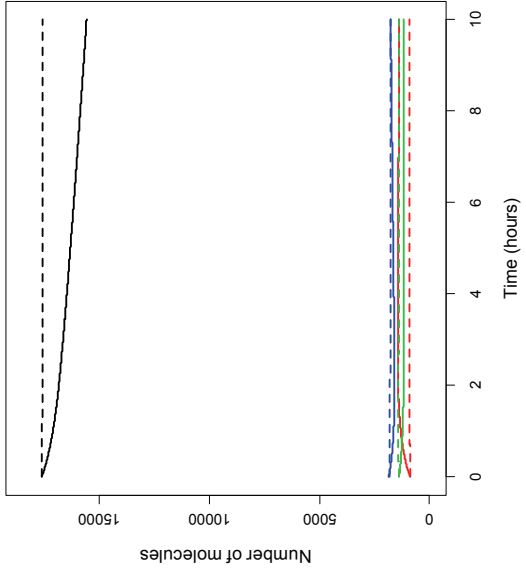

Set Number: 15

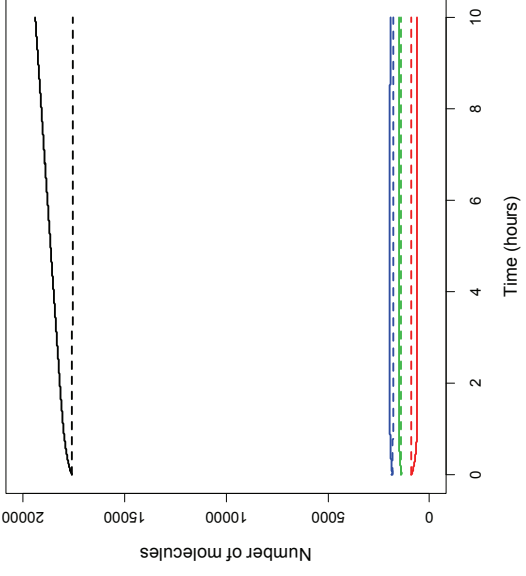

Set Number: 16

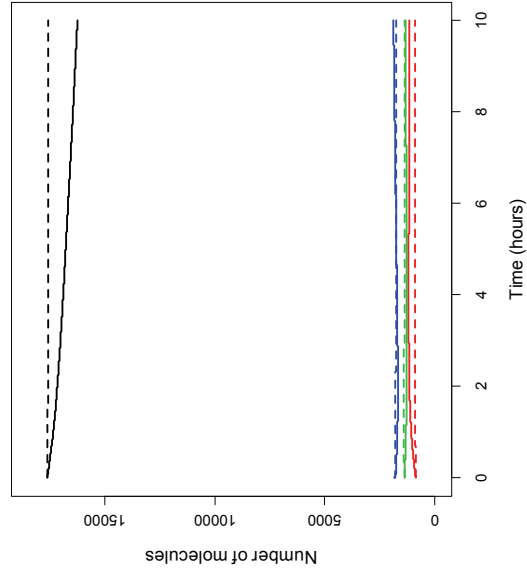

Set Number: 17

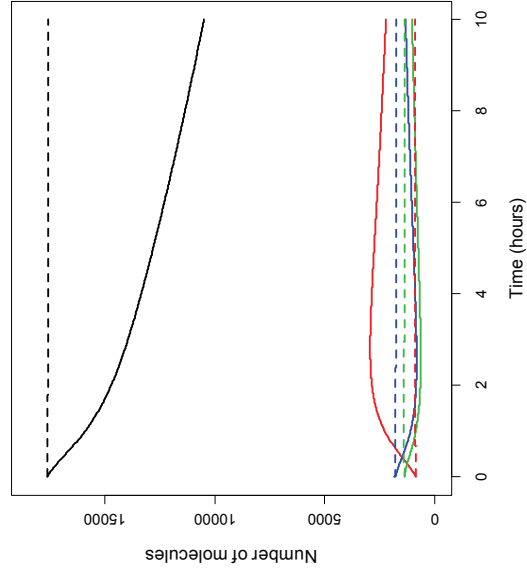

Set Number: 18

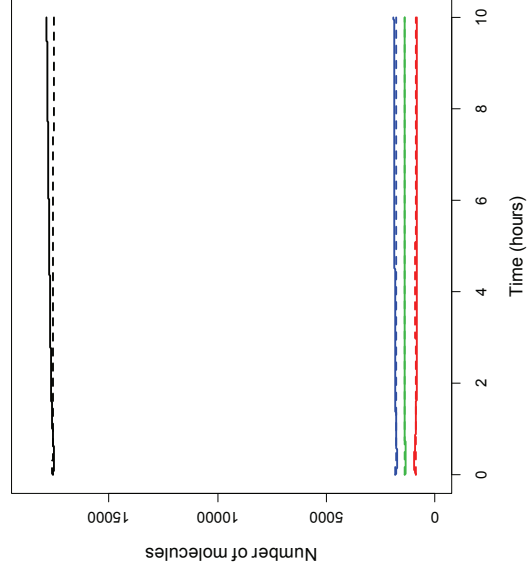

Set Number: 19

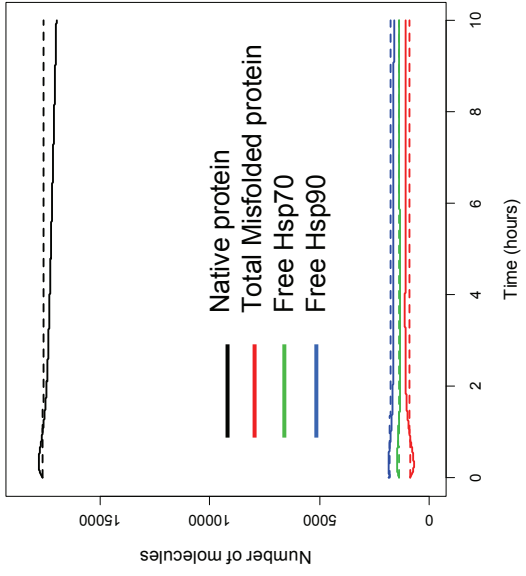

Set Number: 20

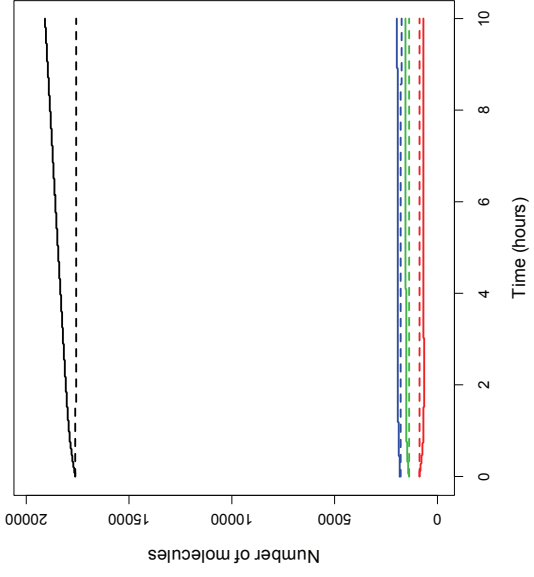

Set Number: 21

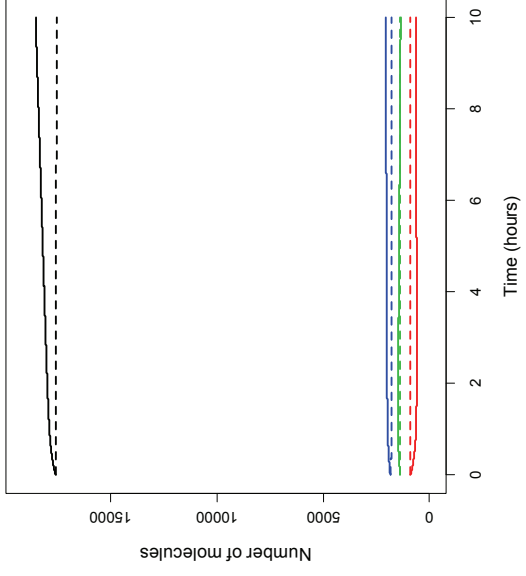

Set Number: 22

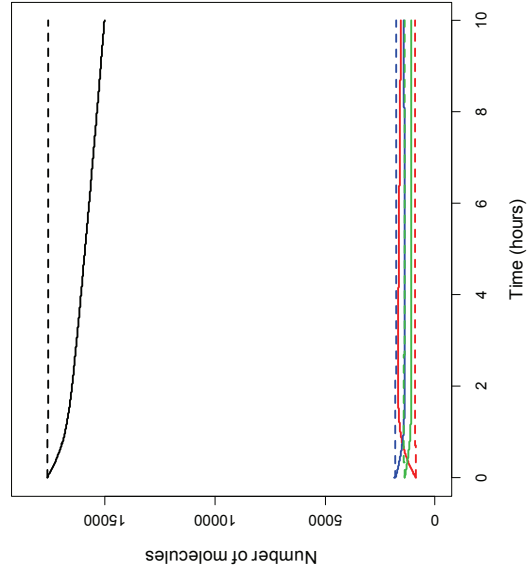

Set Number: 23

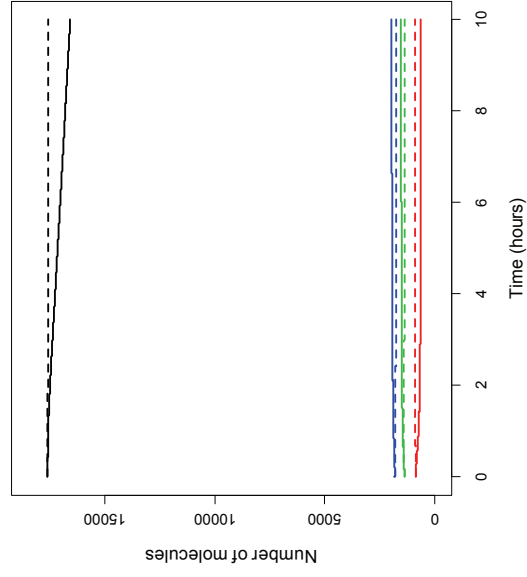

Set Number: 24

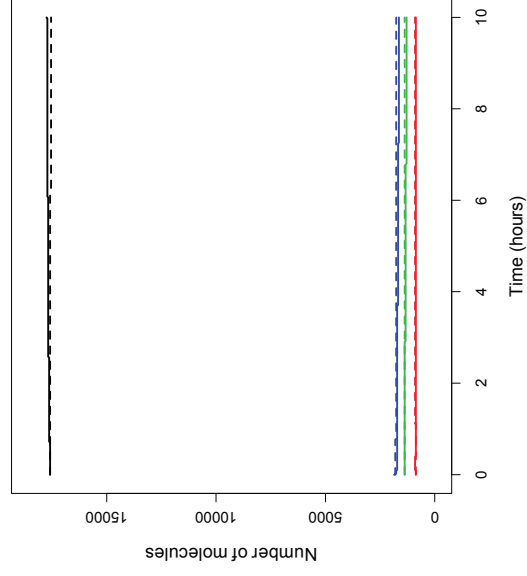

Set Number: 25

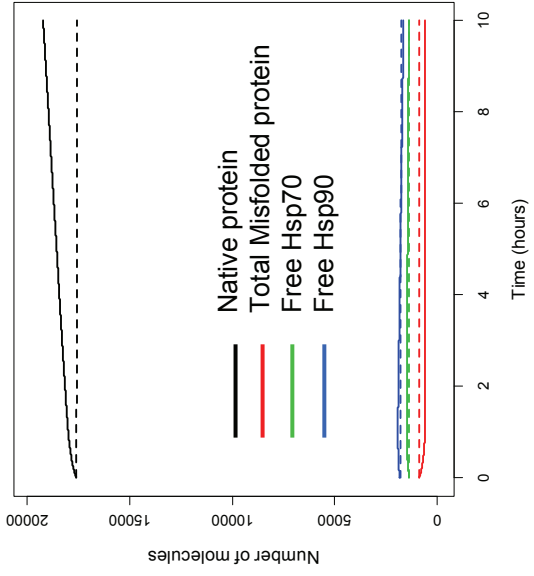

Set Number: 26

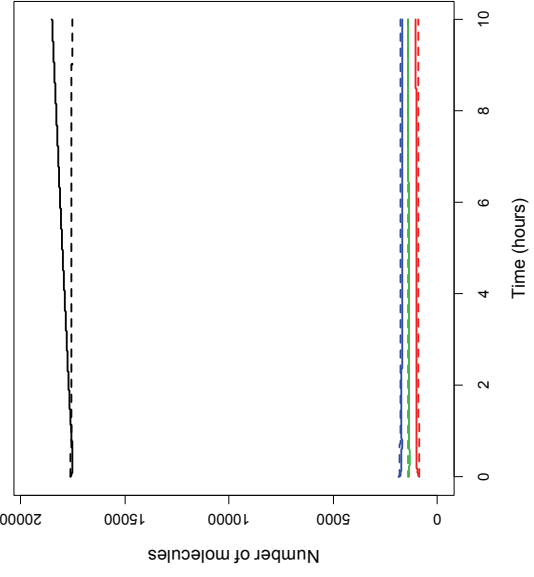

Set Number: 27

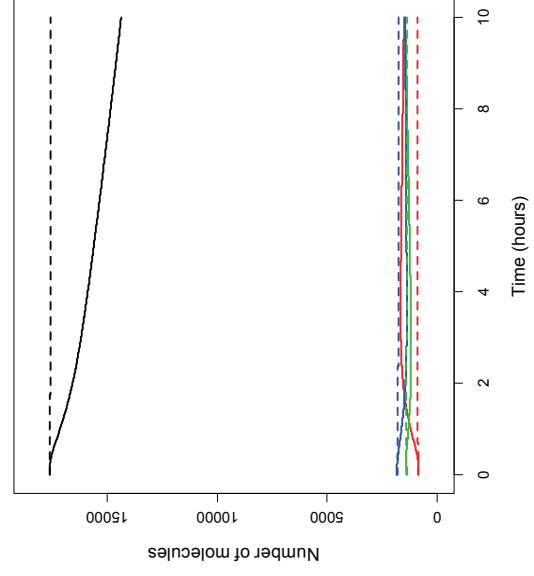

Set Number: 28

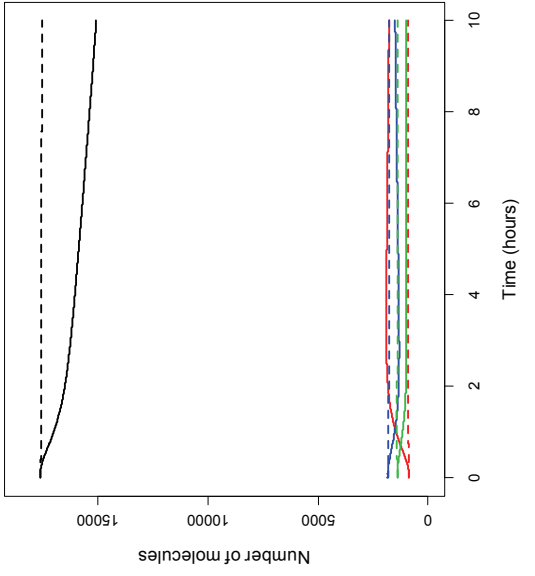

Set Number: 29

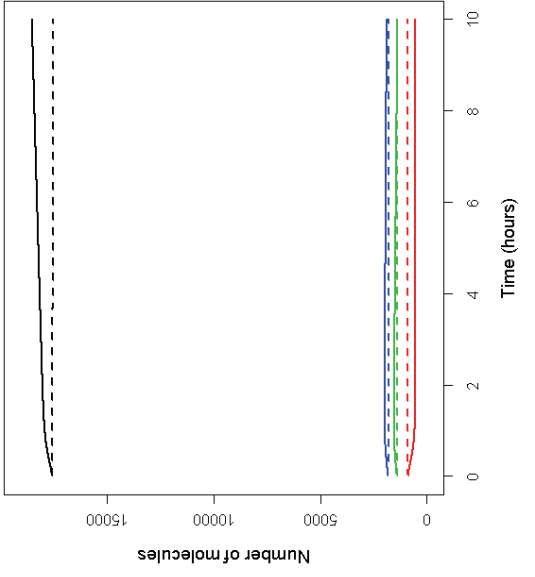

Set Number: 30

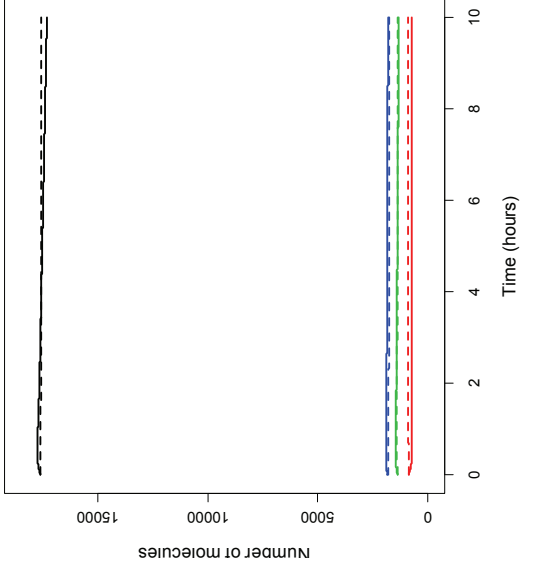

Set Number: 31

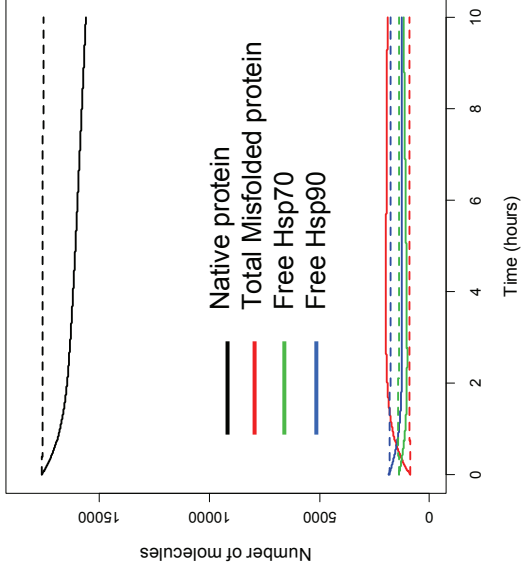

Set Number: 32

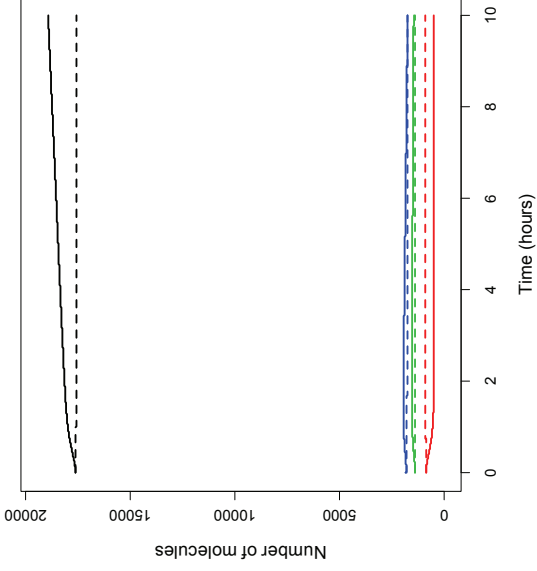

Set Number: 33

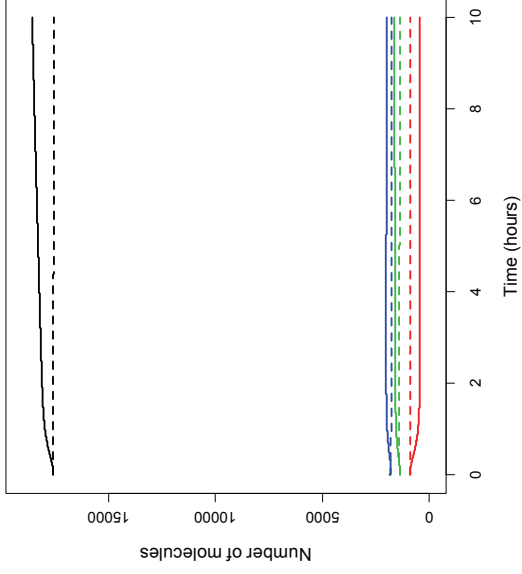

Set Number: 34

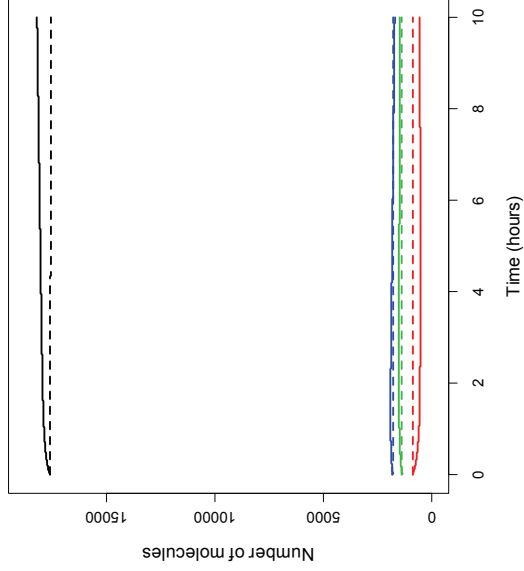

Set Number: 35

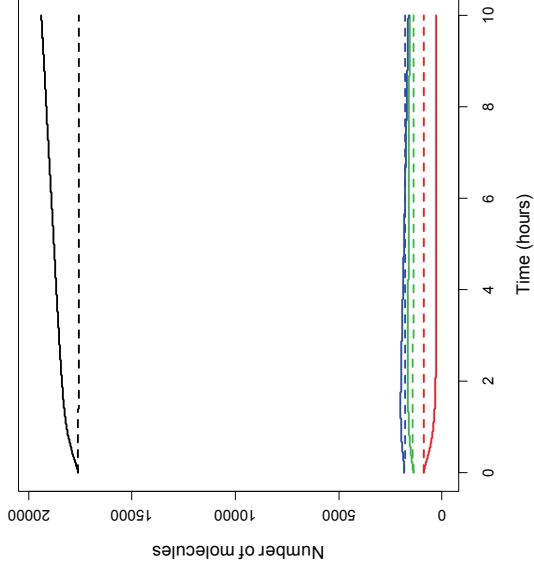

Set Number: 36

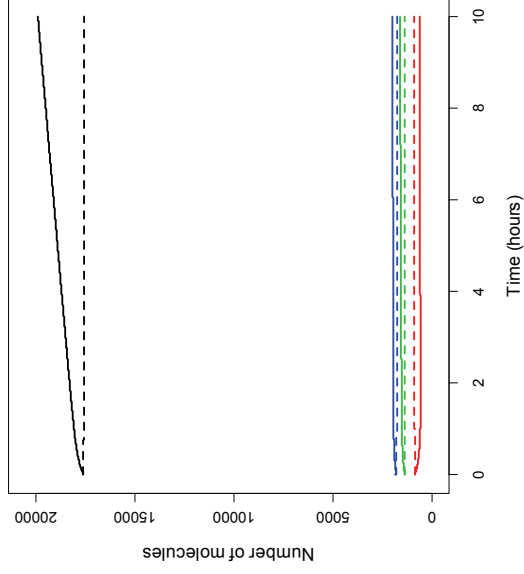

Set Number: 37

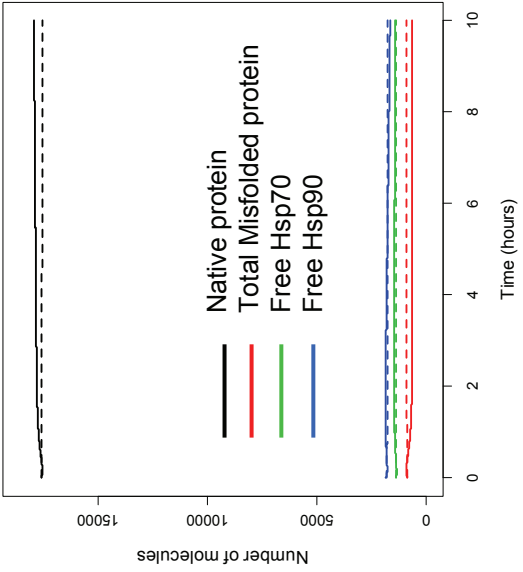

Set Number: 38

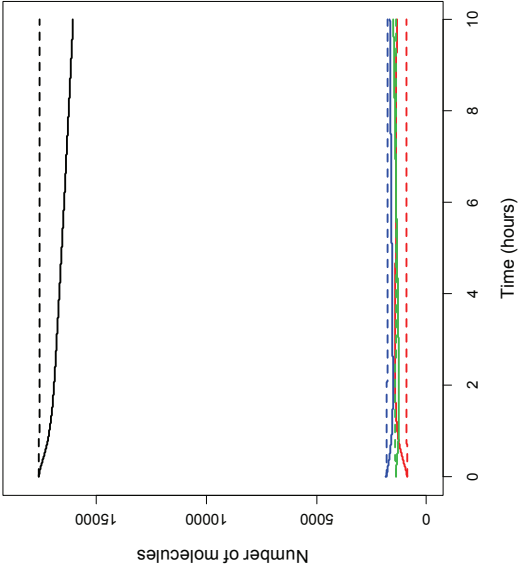

Set Number: 39

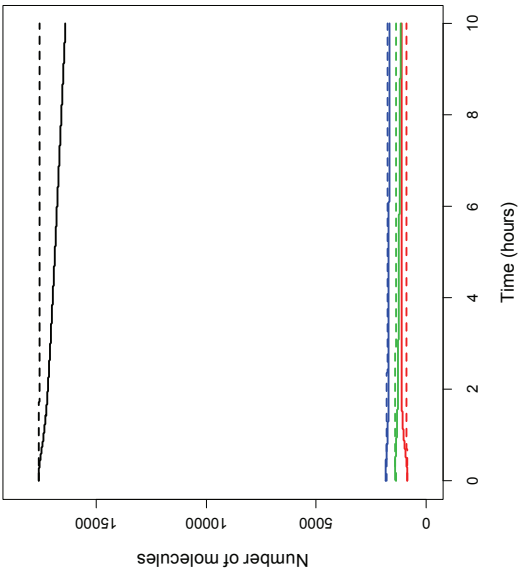

Set Number: 40

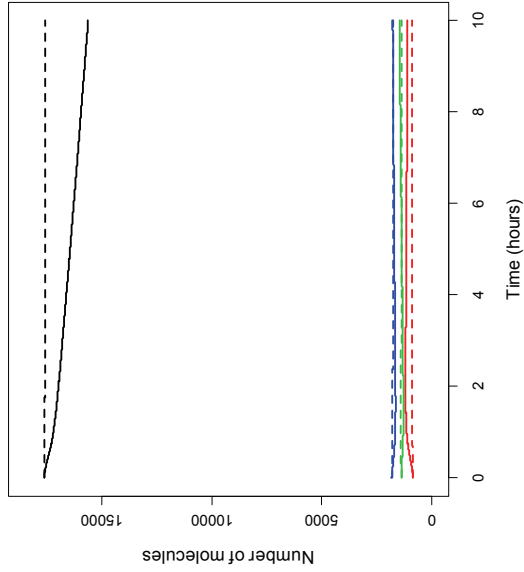

Set Number: 41

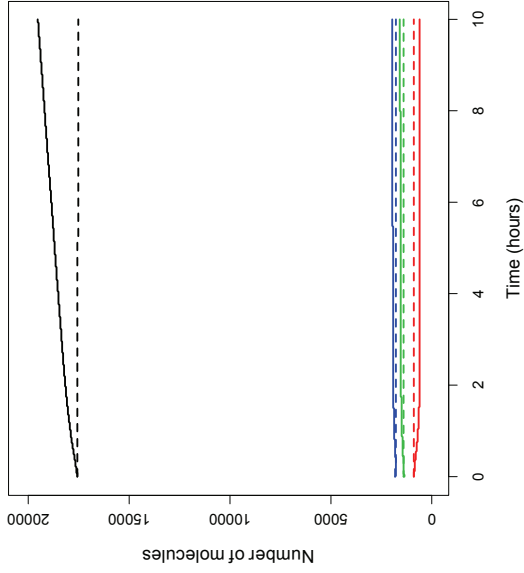

Set Number: 42

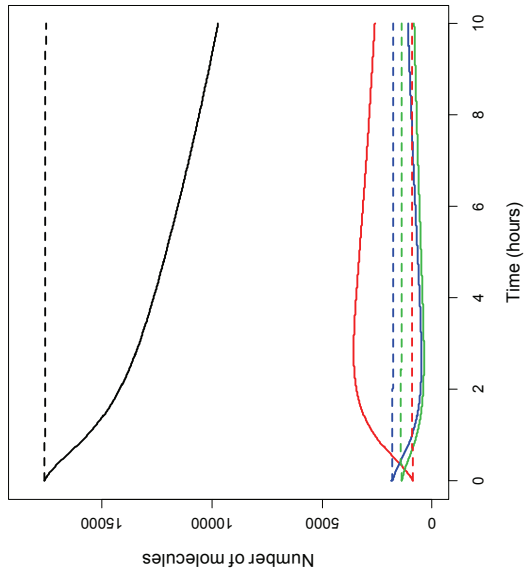

Set Number: 43

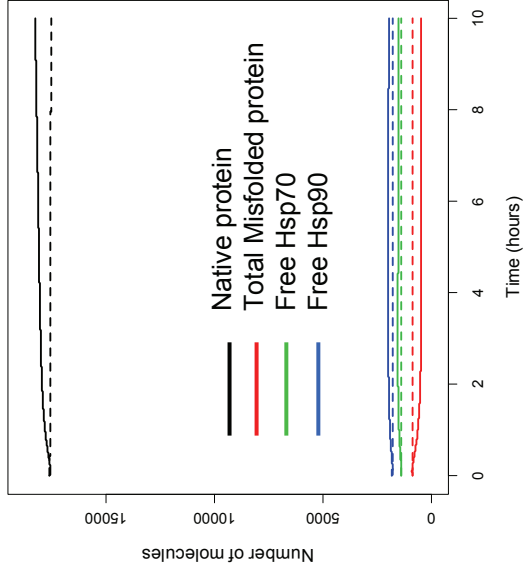

Set Number: 44

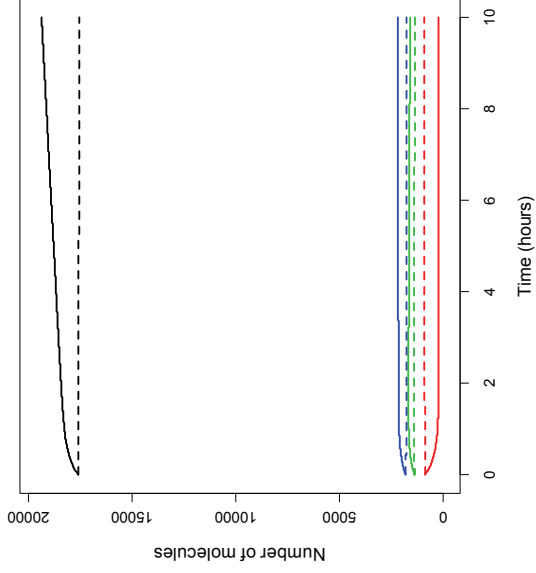

Set Number: 45

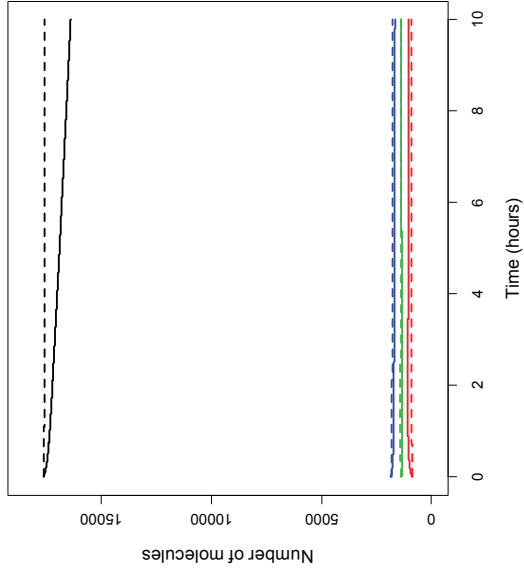

Set Number: 46

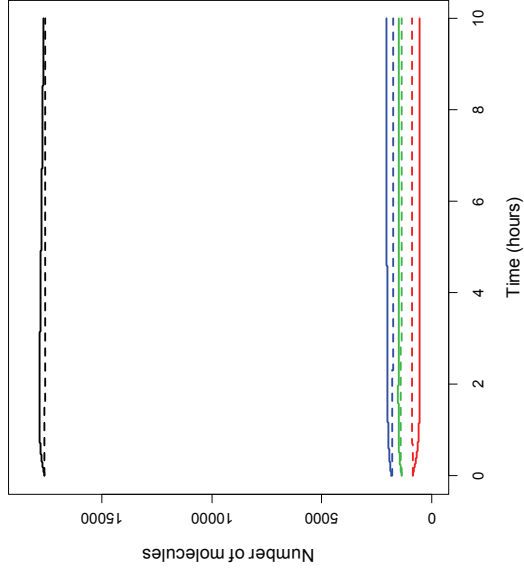

Set Number: 47

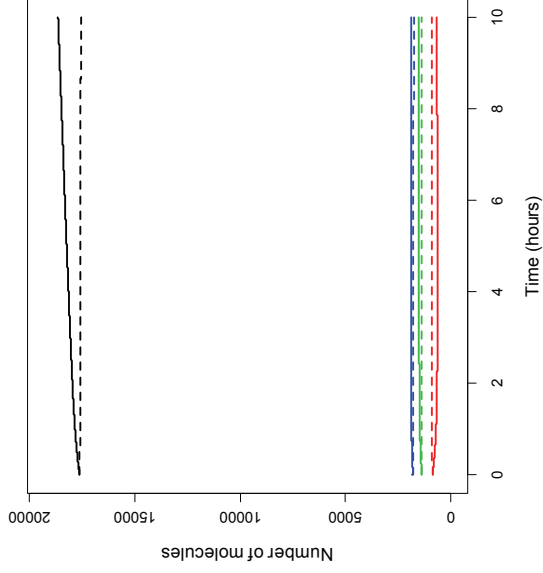

Set Number: 48

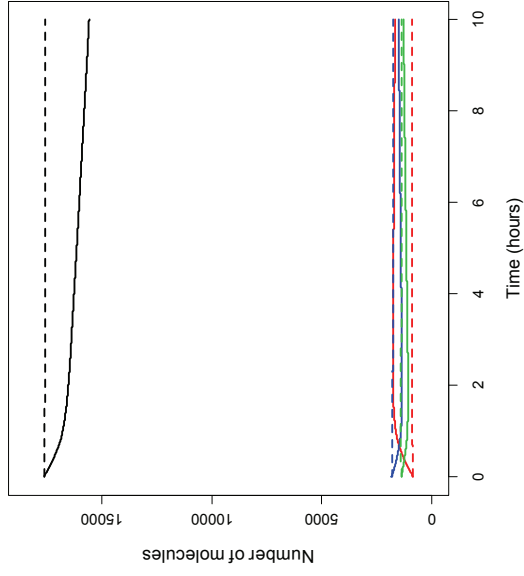



Set Number: 49

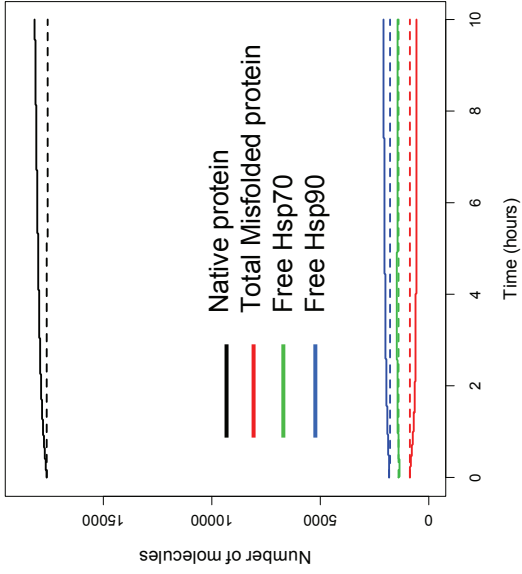

Set Number: 50

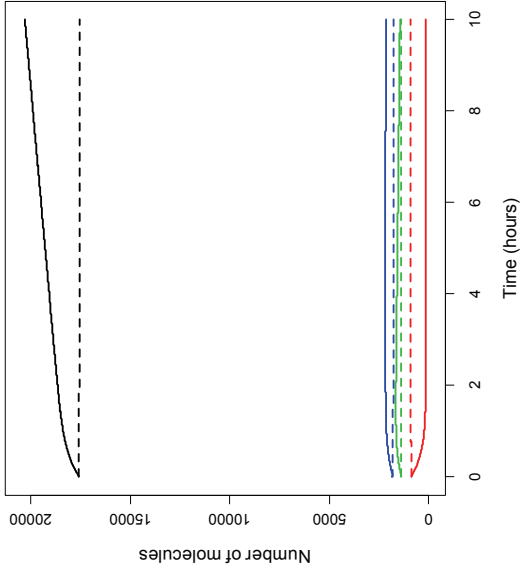

Supplement: pone.0022038.s011.pdf [file pone.0022038.s011.pdf]
