# Supplementary material for: Modelling the Role of the Hsp70/Hsp90 System in the Maintenance of Protein Homeostasis
Source: PLoS One. 2011 Jul 14;6(7):e22038. doi: 10.1371/journal.pone.0022038 (PMC3137010; doi:10.1371/journal.pone.0022038)
Supplement: Table S1 — Results of the global parameter scan. Excel spreadsheet containing full results of 50 randomly chosen parameter sets and the effects on the model predictions. Sheet 1 contains all the parameter values for each set. Sheet 2 shows the percentage difference between each parameter and the default value. Sheet 3 shows the predicted percentage change in mean value for native protein, total misfolded protein, free pools of Hsp70 and Hsp90, and ROS for each parameter set. (XLS) [file pone.0022038.s009.xls]

## Sheet: Parameter sets
	default	set 1	set 2	set 3	set 4	set 5	set 6	set 7	set 8	set9	set 10	set11	set 12	set 13	set 14	set 15	set 16	set 17	set 18	set 19	set 20	set 21	set 22	set 23	set 24	set 25	set 26	set 27	set 28	set 29	set 30	set 31	set 32	set 33	set 34	set 35	set 36	set 37	set 38	set 39	set 40	set 41	set 42	set 43	set 44	set 45	set 46	set 47	set 48
ksynNatP	0.042	0.0719402	0.0485338	0.0367636	0.0723495	0.0751385	0.0796349	0.0769163	0.0568281	0.0498796	0.0626723	0.0786416	0.0313783	0.0606034	0.0688562	0.0667999	0.0475065	0.0336852	0.0801757	0.0797162	0.069302	0.0699062	0.0429193	0.0249569	0.0466408	0.0735908	0.0625268	0.0291652	0.0636043	0.0454599	0.0561713	0.056901	0.0515114	0.0317088	0.0558328	0.0417296	0.0820441	0.042636	0.0752774	0.0348277	0.0222062	0.0728489	0.0809787	0.0340766	0.0478481	0.0581932	0.0392875	0.0782685	0.0326423
kmisfold	2e-06	3.79517e-06	3.84754e-06	1.79616e-06	3.43382e-06	2.14025e-06	3.77125e-06	1.2487e-06	2.47088e-06	3.84899e-06	1.22498e-06	1.01784e-06	3.70135e-06	3.28074e-06	2.6076e-06	2.34849e-06	1.63795e-06	2.84649e-06	3.7271e-06	1.79081e-06	3.26549e-06	2.65698e-06	3.77773e-06	1.58703e-06	1.52683e-06	2.01498e-06	3.90028e-06	1.23268e-06	2.08391e-06	3.57508e-06	2.57398e-06	3.3783e-06	3.30753e-06	3.81131e-06	1.23257e-06	2.27805e-06	1.80893e-06	3.74166e-06	3.24371e-06	3.09233e-06	2.84852e-06	2.0532e-06	2.88793e-06	2.53145e-06	1.42135e-06	3.50516e-06	2.72894e-06	1.03164e-06	3.76279e-06
kbinMisPProt	1e-07	1.13681e-07	8.67511e-08	1.18532e-07	1.80614e-07	8.32441e-08	1.78303e-07	7.59245e-08	1.92407e-07	1.90593e-07	1.46326e-07	9.67518e-08	1.41567e-07	1.70461e-07	1.71193e-07	7.8963e-08	1.4011e-07	1.69416e-07	1.81455e-07	1.83548e-07	9.98664e-08	1.7145e-07	1.39913e-07	1.86782e-07	1.06413e-07	1.22678e-07	6.7194e-08	1.41738e-07	1.3501e-07	1.09215e-07	1.92907e-07	9.51082e-08	1.00775e-07	7.17595e-08	1.77353e-07	5.10865e-08	8.38302e-08	1.20521e-07	1.61813e-07	1.23358e-07	1.35401e-07	8.34093e-08	1.96064e-07	1.01584e-07	1.2751e-07	1.91622e-07	1.73759e-07	1.73385e-07	8.31876e-08
kdegMisP	0.01	0.0180644	0.0188786	0.0135027	0.018041	0.0112937	0.00891546	0.0116028	0.00514531	0.0156769	0.00638913	0.0122691	0.01358	0.0101983	0.0128118	0.018292	0.0170568	0.0176355	0.0113333	0.0149284	0.00695064	0.0176039	0.00504295	0.0168635	0.00790923	0.0163714	0.0175247	0.0130911	0.00779342	0.0116703	0.016639	0.00904154	0.00574271	0.0188237	0.0122206	0.00635871	0.00627854	0.00996787	0.0158202	0.0183767	0.00717338	0.00675939	0.00812833	0.012144	0.0167561	0.00534957	0.0077033	0.00929249	0.0143661
kagg	1e-08	6.80607e-09	1.19911e-08	1.59249e-08	6.23143e-09	1.68733e-08	1.5721e-08	1.13005e-08	6.75373e-09	1.77354e-08	9.81077e-09	7.31897e-09	5.14304e-09	1.34312e-08	1.11383e-08	1.01392e-08	1.00941e-08	1.73862e-08	1.00621e-08	1.68778e-08	9.5726e-09	8.93545e-09	1.92346e-08	8.09726e-09	1.79367e-08	5.17721e-09	7.66629e-09	6.59236e-09	1.42645e-08	1.65512e-08	1.5188e-08	1.59482e-08	1.74226e-08	8.36752e-09	6.72017e-09	7.75836e-09	1.77556e-08	1.03157e-08	1.05457e-08	9.97549e-09	1.61449e-08	1.60606e-08	6.5664e-09	1.85315e-08	7.93761e-09	1.85969e-08	6.67075e-09	7.25223e-09	1.24204e-08
kseqagg	7e-07	5.0517e-07	1.10454e-06	1.38276e-06	4.3519e-07	4.3651e-07	9.98888e-07	6.04763e-07	1.23884e-06	4.9876e-07	1.09878e-06	7.93742e-07	3.83958e-07	9.6175e-07	1.32417e-06	7.89366e-07	6.75685e-07	5.13847e-07	7.49472e-07	6.97341e-07	6.51135e-07	1.30546e-06	5.0865e-07	7.29399e-07	6.68472e-07	1.20088e-06	5.29268e-07	1.16252e-06	1.08647e-06	1.17407e-06	7.42643e-07	8.59711e-07	7.27173e-07	1.03241e-06	1.32481e-06	1.31682e-06	1.07325e-06	3.70335e-07	7.79112e-07	4.75899e-07	8.87043e-07	1.16485e-06	1.37902e-06	6.32343e-07	1.36446e-06	1.19187e-06	8.01068e-07	1.35953e-06	3.81102e-07
kbinAggPProt	1e-05	1.73172e-05	8.70417e-06	1.19531e-05	6.64355e-06	1.93419e-05	1.61063e-05	1.83699e-05	6.89358e-06	1.11074e-05	1.45506e-05	1.34246e-05	1.56356e-05	9.63618e-06	1.75255e-05	1.70218e-05	1.86102e-05	6.60923e-06	1.80307e-05	1.37787e-05	5.34082e-06	8.71005e-06	1.11846e-05	6.7298e-06	5.99636e-06	1.51216e-05	1.18018e-05	1.3855e-05	1.51826e-05	8.83205e-06	1.27266e-05	1.93154e-05	1.13508e-05	1.77479e-05	6.11769e-06	1.52871e-05	6.18465e-06	6.26532e-06	1.2326e-05	1.01508e-05	1.75214e-05	1.95687e-05	1.6482e-05	1.06198e-05	6.7086e-06	8.78761e-06	1.50883e-05	1.5266e-05	1.56088e-05
kbinHspMisp	8e-06	4.80526e-06	1.54788e-05	1.17074e-05	9.26562e-06	1.41383e-05	1.54232e-05	1.41624e-05	1.40768e-05	9.46449e-06	1.39439e-05	1.40287e-05	4.51934e-06	7.53533e-06	1.42403e-05	1.18107e-05	7.11098e-06	5.10445e-06	1.00069e-05	1.3689e-05	1.38747e-05	9.98916e-06	4.27629e-06	6.44215e-06	5.78095e-06	1.12982e-05	1.29568e-05	6.73866e-06	1.38755e-05	9.13614e-06	8.28018e-06	8.56803e-06	1.06177e-05	9.99902e-06	1.28957e-05	1.57019e-05	6.61562e-06	1.00857e-05	1.59448e-05	4.01771e-06	6.7674e-06	1.0488e-05	1.35835e-05	1.00529e-05	1.04056e-05	5.43784e-06	1.17263e-05	1.51402e-05	8.46551e-06
krelHspMisp	8e-05	6.19488e-05	8.27966e-05	0.000126089	8.60411e-05	9.22091e-05	6.76745e-05	8.31846e-05	0.000142148	0.00012571	6.2635e-05	0.000126163	8.54546e-05	0.000113419	0.000136092	0.000134627	5.07869e-05	0.000158993	0.000151622	0.000117987	0.000134562	6.32779e-05	9.17821e-05	5.57089e-05	0.000106919	0.00012047	0.000132892	0.000106036	8.94373e-05	0.000101274	5.75735e-05	0.000106035	0.000101062	0.000135629	7.4567e-05	7.26526e-05	9.78797e-05	7.21642e-05	7.82466e-05	0.000132806	5.85568e-05	8.31717e-05	6.88564e-05	0.000136888	0.000129568	9.62515e-05	0.000158872	6.57546e-05	0.000136661
krefold	0.00055	0.000320672	0.000375049	0.000664973	0.000849039	0.000762686	0.000495339	0.000394666	0.000544815	0.000566028	0.000745295	0.000994851	0.000989067	0.000783294	0.000370921	0.000978259	0.000291172	0.000379841	0.00066571	0.00109402	0.000980555	0.000921786	0.000702832	0.000374542	0.000328806	0.000852295	0.000712924	0.000476923	0.000752573	0.00101398	0.0010412	0.000430944	0.000913026	0.000820637	0.000573845	0.000717164	0.000879136	0.000703793	0.000816262	0.00100095	0.000903808	0.000539375	0.00042219	0.00045925	0.00101337	0.00069306	0.000927251	0.000339257	0.000762705
kbinHsf1Hsp90	0.02	0.0388841	0.034533	0.0154663	0.0123211	0.0261584	0.0152712	0.0350161	0.0371312	0.0107149	0.0253379	0.0263913	0.0322459	0.033734	0.0190605	0.0226185	0.0285632	0.0301769	0.0137526	0.012951	0.031507	0.0170986	0.0207651	0.0184449	0.0316785	0.0347071	0.0245763	0.0380909	0.0186206	0.0321839	0.0371657	0.021229	0.0210952	0.0190138	0.0277475	0.0149091	0.0235682	0.037641	0.0244453	0.0375113	0.035583	0.0193835	0.0220104	0.012903	0.0273715	0.0212052	0.0381054	0.0205661	0.0172096
krelHsf1Hsp90	0.5	0.918628	0.692666	0.487453	0.752413	0.266747	0.40809	0.3289	0.894402	0.450965	0.502546	0.995798	0.400975	0.360012	0.322342	0.660735	0.813783	0.554015	0.986264	0.771999	0.394263	0.61311	0.312416	0.313165	0.972928	0.697917	0.715772	0.26691	0.397326	0.316877	0.807321	0.364272	0.519292	0.945623	0.713286	0.268063	0.30915	0.381347	0.991572	0.565036	0.392329	0.495678	0.74924	0.652252	0.398083	0.9141	0.302914	0.699467	0.730784
kdimerHsf1	8e-05	0.000105111	0.000148225	0.000147866	9.08818e-05	0.000145338	0.000123264	8.62293e-05	0.000145464	0.00015704	4.56284e-05	8.57458e-05	5.61731e-05	0.000123592	4.8433e-05	0.000142922	0.00014228	0.00014833	7.61297e-05	0.000150109	9.75433e-05	0.000104571	0.000156111	4.75781e-05	6.54967e-05	6.43632e-05	0.000101874	0.00013756	4.30912e-05	7.94538e-05	0.000122543	5.92427e-05	7.79528e-05	7.91073e-05	0.000133522	8.08101e-05	8.65739e-05	0.000137016	0.000123678	0.000131511	0.000111343	0.000140325	6.02115e-05	0.000133073	7.82373e-05	0.000152806	5.50208e-05	7.84144e-05	5.09148e-05
ktrimerHsf1	0.01	0.00988684	0.00952713	0.0186957	0.0161705	0.0178304	0.0050426	0.00765093	0.0102986	0.0167562	0.0127644	0.00954028	0.00647928	0.019996	0.0108113	0.0109338	0.016061	0.00698709	0.0163894	0.0124621	0.0166063	0.0120852	0.0082563	0.00971621	0.00794186	0.0193019	0.0100889	0.0141056	0.00624039	0.0124407	0.00922545	0.0053879	0.0164741	0.00813121	0.00732811	0.0107794	0.0143805	0.0132546	0.00761694	0.0195538	0.013539	0.0113363	0.00563139	0.0170401	0.0183366	0.00805449	0.00666048	0.014243	0.00608374
kdetrimerHsf1	0.5	0.386365	0.358783	0.536242	0.379616	0.729256	0.587677	0.433412	0.511285	0.937211	0.97014	0.385827	0.579356	0.559135	0.473208	0.808063	0.933393	0.570777	0.389577	0.394772	0.941463	0.899204	0.613429	0.830263	0.506093	0.493286	0.385205	0.473044	0.386956	0.779212	0.336932	0.453965	0.486582	0.775479	0.835968	0.476777	0.942739	0.619665	0.851101	0.283033	0.640096	0.733464	0.31952	0.867826	0.581932	0.737171	0.815524	0.733486	0.361557
kdedimerHsf1	0.5	0.64612	0.862283	0.685148	0.580385	0.270356	0.854763	0.873174	0.643248	0.652498	0.525382	0.897867	0.520156	0.680929	0.400627	0.543642	0.657211	0.42076	0.81942	0.257188	0.274994	0.302735	0.74984	0.705406	0.900966	0.862983	0.719249	0.475284	0.60068	0.463379	0.70206	0.535803	0.786586	0.258069	0.859848	0.618656	0.51208	0.716092	0.666275	0.564166	0.864735	0.559556	0.286438	0.746309	0.749268	0.656	0.869195	0.694158	0.544823
kbinHSEHsf1	0.05	0.0373489	0.0420138	0.0981174	0.0880693	0.0437118	0.0825147	0.0321499	0.026631	0.0622211	0.0990151	0.0966161	0.0948317	0.0951841	0.0824165	0.0535979	0.0509033	0.0254419	0.0868588	0.0448526	0.0481343	0.0382627	0.0576075	0.0946182	0.053067	0.0471561	0.03158	0.0251979	0.0347352	0.0553501	0.0651636	0.0505987	0.0630253	0.0412673	0.0660499	0.0668835	0.0608709	0.0695677	0.055826	0.0704477	0.0869344	0.09797	0.0378987	0.0629127	0.0384778	0.0506473	0.060048	0.0982413	0.0860842
krelHSEHsf1	0.08	0.144192	0.0758893	0.150861	0.154802	0.0941963	0.0521986	0.0408246	0.123466	0.0733487	0.0949342	0.129459	0.0825441	0.0873173	0.14438	0.153993	0.0407256	0.103271	0.140734	0.134412	0.0705149	0.145966	0.0655082	0.0538621	0.0565133	0.119126	0.0456116	0.0859899	0.117604	0.0912246	0.0829397	0.123464	0.126098	0.045997	0.1381	0.127909	0.0476852	0.0997603	0.118624	0.144693	0.132223	0.153387	0.0995385	0.122681	0.129873	0.128154	0.0918053	0.128137	0.0899069
kupregHsp	0.2	0.241372	0.353142	0.183693	0.313926	0.208485	0.394629	0.368855	0.256483	0.276377	0.218637	0.317769	0.16366	0.23423	0.376638	0.368002	0.120544	0.164298	0.301677	0.316148	0.261031	0.129356	0.257158	0.231558	0.237538	0.120207	0.36446	0.23046	0.347242	0.177086	0.151984	0.293793	0.386832	0.225609	0.282693	0.146996	0.253247	0.386092	0.168063	0.108255	0.274269	0.375548	0.129816	0.204757	0.363788	0.104941	0.310334	0.358514	0.107223
kbasalsynHsp70	0.008	0.00529983	0.00906423	0.00937441	0.0138942	0.00826372	0.0106819	0.00552354	0.00904855	0.00874543	0.00971443	0.0079274	0.0151611	0.0136562	0.00660707	0.0122899	0.0107261	0.00822429	0.0131345	0.0130915	0.0157878	0.0062764	0.00408376	0.0106946	0.00428114	0.0111033	0.0132079	0.0156479	0.00832825	0.00705033	0.00703089	0.015943	0.00646986	0.0109557	0.00428497	0.0113381	0.010606	0.00470953	0.0142851	0.00440555	0.0115312	0.0119918	0.00860833	0.00778872	0.00568864	0.0101564	0.0109973	0.0117373	0.0123419
kbasalsynHsp90	0.008	0.00590654	0.0155036	0.00432241	0.0116259	0.0137341	0.00524676	0.0121082	0.00971245	0.00497604	0.0146775	0.00576587	0.0142428	0.00656253	0.0130816	0.0114336	0.0139583	0.0121035	0.0121023	0.00548613	0.0130924	0.0122724	0.0056663	0.0103379	0.0115488	0.00601875	0.0151417	0.00541684	0.0131939	0.0119147	0.0138221	0.00581977	0.00897099	0.0063805	0.00662371	0.00482927	0.00864018	0.00697198	0.0126019	0.0073505	0.0108318	0.0145589	0.00914319	0.00407032	0.0132295	0.0072428	0.0087458	0.00731844	0.0139246
kbinHsp70Prot	1.2e-08	8.56115e-09	1.86042e-08	7.41035e-09	2.37242e-08	1.62936e-08	6.00567e-09	1.83776e-08	6.33477e-09	2.28411e-08	1.25626e-08	1.13722e-08	7.84283e-09	1.42598e-08	1.41807e-08	1.69928e-08	1.55368e-08	7.72615e-09	1.89686e-08	1.85768e-08	1.72704e-08	1.52586e-08	1.18932e-08	1.2856e-08	1.13254e-08	1.89815e-08	1.56263e-08	6.70747e-09	2.07325e-08	1.77601e-08	1.65297e-08	1.60791e-08	1.21598e-08	1.17694e-08	6.77393e-09	1.70576e-08	8.29745e-09	8.30618e-09	6.78958e-09	1.60379e-08	8.66128e-09	1.26892e-08	2.28365e-08	1.31284e-08	9.91382e-09	1.19758e-08	1.70987e-08	1.47214e-08	8.31424e-09
kbinHsp90Prot	1e-08	1.37994e-08	1.2314e-08	9.01835e-09	1.66409e-08	1.41274e-08	1.06853e-08	1.46711e-08	7.83329e-09	9.15898e-09	1.2011e-08	1.7192e-08	6.71388e-09	1.845e-08	9.12882e-09	1.18153e-08	7.2602e-09	9.8917e-09	1.09029e-08	1.25675e-08	1.10863e-08	8.44945e-09	7.96518e-09	9.16268e-09	1.81988e-08	1.76471e-08	1.82228e-08	1.09038e-08	1.03862e-08	1.52428e-08	1.72593e-08	1.39751e-08	1.80885e-08	8.05179e-09	1.53746e-08	1.99753e-08	6.71618e-09	1.82276e-08	1.09218e-08	1.01986e-08	1.03105e-08	1.34159e-08	7.69452e-09	5.52058e-09	1.16979e-08	1.30349e-08	6.67978e-09	8.14319e-09	1.58112e-08
kdegHsp70	0.01	0.0157158	0.0160243	0.00791664	0.0164106	0.0067573	0.00626137	0.0103175	0.0179654	0.0100127	0.00855739	0.0127445	0.0179348	0.00531814	0.00609545	0.00869966	0.0167204	0.0186735	0.0172859	0.00738794	0.0152089	0.00502383	0.0189628	0.00529683	0.015761	0.00548181	0.0169144	0.0141367	0.0114852	0.00562109	0.00711236	0.00809353	0.019449	0.0188169	0.014005	0.00991765	0.0155953	0.0170563	0.0111386	0.0117358	0.0181637	0.00626479	0.0123741	0.0179952	0.00675669	0.00573921	0.0190465	0.0125548	0.010058
kdegHsp90	0.01	0.0151502	0.00614928	0.0157402	0.0055682	0.013433	0.014512	0.0182949	0.018307	0.0196065	0.0177344	0.00546415	0.0136438	0.00559876	0.0181925	0.00808975	0.0164652	0.00927946	0.00694666	0.00563333	0.0159648	0.0174459	0.00739232	0.00833299	0.0197943	0.0188372	0.0128236	0.00661331	0.00970204	0.00894174	0.0147291	0.00791028	0.00872666	0.0114825	0.0121634	0.00793792	0.0121687	0.0164941	0.0167723	0.0166046	0.0110665	0.010024	0.0148946	0.00527573	0.0137981	0.00837075	0.00899264	0.0122188	0.0153135
kgenROS	0.01	0.0134542	0.00544563	0.00778985	0.0127934	0.0176537	0.0174398	0.0115599	0.0133701	0.00774151	0.00778171	0.0138292	0.00751383	0.00532912	0.0179042	0.0160085	0.0101717	0.0183097	0.00835786	0.01484	0.0116149	0.00977842	0.0175447	0.0111855	0.0138113	0.0178382	0.0093215	0.01513	0.0152216	0.00829346	0.00716633	0.0187599	0.00584594	0.00610603	0.0177483	0.00540961	0.00709036	0.00811055	0.015317	0.00738693	0.0188113	0.00720328	0.0179299	0.00675396	0.0110649	0.0102741	0.0123663	0.00747491	0.0198387
kremROS	0.001	0.00163267	0.00116583	0.00128135	0.0019461	0.00119721	0.00101033	0.00195691	0.00158085	0.000512779	0.000682684	0.00182351	0.000719086	0.000651998	0.00169715	0.00170863	0.000933721	0.000838989	0.0012931	0.000572657	0.00150018	0.00126285	0.00134886	0.00146016	0.00182686	0.00183324	0.00132785	0.000522335	0.000540824	0.00147725	0.000591948	0.00168604	0.00120786	0.0017769	0.00160425	0.00159058	0.000704782	0.00166321	0.0010788	0.000633136	0.00127645	0.00116064	0.00060071	0.00189339	0.00173299	0.00120688	0.00158447	0.000725871	0.00139581
kbinHsp70client	0.0002	0.000343136	0.000240458	0.000114326	0.000285912	0.000188018	0.000164425	0.000347668	0.000306644	0.000395827	0.000274036	0.000143301	0.000160344	0.000147537	0.000323092	0.000328885	0.000382037	0.000262311	0.00031417	0.000111278	0.000237983	0.000367077	0.000251353	0.000231047	0.000360383	0.000275431	0.000234722	0.000212015	0.00015476	0.000166762	0.000236558	0.000205165	0.000176934	0.000176181	0.000217489	0.000194952	0.000246627	0.000183929	0.000232452	0.000293057	0.000299335	0.000359721	0.000313196	0.000233466	0.000130524	0.000310308	0.000240447	0.000216639	0.000309545
krelHsp70client	5	2.64721	4.33617	3.7841	8.7474	7.40019	5.47793	2.67184	6.26169	6.40922	8.68593	7.12909	5.40686	6.3344	5.33193	4.07159	8.63272	7.2836	3.66004	2.63848	8.73574	4.0473	2.56625	4.88617	4.9523	3.4278	4.44939	8.43152	2.663	9.59919	6.07744	6.01799	4.84287	2.84413	3.32555	7.73542	3.85934	2.73582	5.03009	9.52602	4.17494	8.66536	4.41843	7.01664	5.5529	2.80028	4.30758	4.72232	5.68024
kbinHsp90client	0.0002	0.00022126	0.000207466	0.00035654	0.000171106	0.000312627	0.000184151	0.000229192	0.000355051	0.000191888	0.000315009	0.000185925	0.0003888	0.000335791	0.000218936	0.00029137	0.000253806	0.000239673	0.000205867	0.000386877	0.000203534	0.000185249	0.000386869	0.000375737	0.000212602	0.000167285	0.000374481	0.000122366	0.000333594	0.00025456	0.000245064	0.000220438	0.000130985	0.000276424	0.000237022	0.000381579	0.000286069	0.000363926	0.000204208	0.00016318	0.000167878	0.000389576	0.000289935	0.000171499	0.000217097	0.000230072	0.000170862	0.000346939	0.00014013
krelHsp90client	5	2.53792	9.28697	2.91591	6.98901	5.21467	8.1551	8.42473	2.69051	8.3264	3.26744	4.51477	5.43871	6.09548	9.859	8.47395	3.87681	4.26044	5.08318	6.57791	7.76568	7.39234	7.36623	8.28574	2.77333	9.09363	7.99531	4.92274	6.81422	9.65937	9.73802	9.27387	8.56803	5.54271	6.76082	9.18869	4.97568	7.59534	7.3049	6.03125	4.82381	4.976	3.30724	4.2994	9.03544	7.95676	8.52328	7.48485	5.32098
kphosJnk	0.02	0.0318567	0.0134784	0.0225089	0.024467	0.0369228	0.0284679	0.0389015	0.0371138	0.0215159	0.0295889	0.0341881	0.0187241	0.0343449	0.0317641	0.0163441	0.0118108	0.0284158	0.025626	0.0183113	0.0116177	0.0271789	0.0110409	0.0329464	0.0275494	0.0320853	0.0120318	0.0160014	0.0246387	0.0385566	0.0162554	0.0223629	0.0180991	0.0391943	0.030793	0.0107607	0.0135638	0.0129752	0.030835	0.0270763	0.0171441	0.0281073	0.0290866	0.0111472	0.0271381	0.0366355	0.0121589	0.0227357	0.0236023
kdephosJnkMkp1	0.05	0.0316823	0.0445036	0.0366952	0.0976982	0.0594403	0.0730335	0.0908788	0.0260077	0.0610027	0.0323275	0.04834	0.0503794	0.0544567	0.061905	0.0868462	0.090641	0.0380586	0.0383263	0.036593	0.0603912	0.0475025	0.0836378	0.0899323	0.0405261	0.0924083	0.0927755	0.0288686	0.07811	0.0745159	0.0777175	0.0778145	0.0743559	0.0898911	0.0965566	0.0543164	0.0314785	0.0984592	0.058211	0.041651	0.0786202	0.0261835	0.0601509	0.039609	0.0414074	0.0522767	0.0860782	0.0738439	0.0462408
kbinHsp70Ppx	0.2	0.348957	0.361543	0.265177	0.335104	0.31332	0.392924	0.131065	0.101327	0.201071	0.114884	0.296693	0.150976	0.262114	0.239574	0.13511	0.355837	0.349474	0.101912	0.355081	0.101382	0.131902	0.243365	0.180749	0.303196	0.11677	0.246282	0.139624	0.358181	0.257438	0.33121	0.39388	0.380326	0.140539	0.370492	0.347271	0.115532	0.214592	0.105946	0.319995	0.176151	0.257939	0.336591	0.163317	0.196989	0.334457	0.311465	0.33302	0.157929
krelHsp70Ppx	5	9.14258	7.38063	9.21496	8.49518	5.90073	5.37048	8.82417	3.0235	3.05296	7.07598	7.51765	8.00005	7.95831	3.80098	2.80347	7.24741	8.77593	3.0567	5.82022	6.11165	7.76201	4.77668	7.03238	7.62984	9.71686	6.67107	9.09844	6.83155	3.70324	6.09577	3.22601	7.36394	5.09888	4.97741	4.41602	6.89442	3.24705	6.82281	9.46696	2.81358	8.70082	9.04141	8.87205	5.44327	4.47873	4.21183	4.81747	6.26163
kphosHsf1	0.03	0.0477894	0.0550015	0.0456261	0.0500634	0.0551481	0.0159585	0.0364594	0.0595197	0.0437753	0.0323723	0.0265526	0.0195748	0.0231061	0.0344049	0.0195387	0.0532097	0.0359107	0.0460166	0.0319354	0.0541629	0.0258784	0.0567651	0.0386836	0.0438499	0.0427856	0.0591986	0.0462994	0.0166791	0.0367147	0.0549719	0.0240478	0.0312015	0.0242973	0.0239153	0.0224338	0.0341087	0.0314077	0.0356172	0.0295091	0.0379186	0.0361195	0.0563669	0.0365602	0.0191279	0.0472707	0.0384635	0.0399328	0.0426011
kdephosHsf1	0.01	0.0051296	0.00822274	0.0123135	0.00970891	0.0100771	0.0151579	0.018302	0.0178392	0.00553181	0.00680243	0.0137789	0.0057743	0.0127393	0.0161815	0.0113486	0.0144828	0.00950654	0.0174739	0.00521381	0.0066971	0.0126224	0.0172665	0.0120668	0.0121236	0.0120002	0.00756087	0.00957567	0.0118402	0.00933099	0.0187148	0.0142688	0.0104629	0.0158976	0.0145876	0.0150692	0.0196689	0.00692533	0.0170079	0.0113175	0.0129896	0.0191391	0.0151378	0.0152437	0.00754266	0.0161871	0.0155987	0.0112616	0.00888017
kbinHSEPhosTriH	0.1	0.127912	0.198088	0.0757344	0.137993	0.105	0.0793	0.19531	0.162779	0.11702	0.112688	0.0620228	0.111965	0.118315	0.127013	0.158011	0.195066	0.196155	0.0811177	0.175888	0.18251	0.126774	0.123995	0.0829731	0.133408	0.0889282	0.124396	0.0914807	0.127252	0.076146	0.18273	0.0550299	0.107974	0.0721469	0.0789203	0.0559046	0.143594	0.139797	0.193224	0.0607185	0.158009	0.19293	0.100476	0.177901	0.185864	0.0535046	0.0890777	0.0976283	0.0838043
krelHSEPhosTriH	0.08	0.155817	0.146958	0.0894373	0.0620899	0.118493	0.0648682	0.0448764	0.129521	0.133699	0.122243	0.107431	0.156495	0.0897641	0.0559962	0.138892	0.139416	0.134777	0.0815649	0.10985	0.12758	0.0795411	0.099726	0.136052	0.105703	0.078076	0.0899253	0.0963412	0.0869052	0.046167	0.0648253	0.11417	0.12584	0.0899834	0.131804	0.0610638	0.120006	0.155947	0.145991	0.132593	0.152478	0.0554051	0.0854588	0.0500072	0.0992646	0.155066	0.116071	0.159806	0.138586
kphosp38	0.02	0.018941	0.0228075	0.0122717	0.0323019	0.0300815	0.0361319	0.0240228	0.0397858	0.0220581	0.0100622	0.0288587	0.039948	0.0383097	0.0144203	0.0200097	0.0269105	0.01589	0.0145805	0.0204175	0.0142316	0.0234597	0.0132556	0.0293548	0.0399967	0.0128341	0.0346199	0.0250823	0.0132709	0.0191749	0.0146913	0.0222919	0.0140849	0.0389952	0.0356354	0.0357777	0.0191049	0.0270484	0.039751	0.0369416	0.0213481	0.0227457	0.0108524	0.039584	0.0278246	0.0382265	0.0327312	0.0157717	0.0256022
kdephosp38Mkp1	0.05	0.0601602	0.0350415	0.0846058	0.0840361	0.0563007	0.0976661	0.03495	0.0773371	0.0749584	0.0599475	0.0986508	0.0320387	0.0302008	0.0490781	0.0995797	0.0751812	0.0499273	0.0845329	0.0734672	0.0563142	0.0343172	0.053095	0.0632044	0.0352994	0.0938311	0.0457385	0.040204	0.0460028	0.0567181	0.0541212	0.0481358	0.0271509	0.0610158	0.0371435	0.0824091	0.0368359	0.0731284	0.0490282	0.0271216	0.0400054	0.082805	0.0387373	0.083873	0.0733063	0.0638104	0.0922495	0.0568277	0.0424633
kgenROSAggP	1e-06	7.32024e-07	1.47594e-06	1.75467e-06	1.90019e-06	1.41456e-06	1.8515e-06	8.60077e-07	1.66778e-06	1.24597e-06	1.53795e-06	1.06176e-06	1.80771e-06	1.64182e-06	8.99656e-07	1.16675e-06	1.82869e-06	7.62875e-07	1.92834e-06	1.17881e-06	7.67705e-07	1.80569e-06	1.49307e-06	1.72891e-06	5.19222e-07	1.76387e-06	1.24924e-06	1.21574e-06	1.92274e-06	1.7846e-06	1.83793e-06	1.58339e-06	1.50898e-06	1.93815e-06	1.87467e-06	1.7024e-06	1.90268e-06	1.20263e-06	1.56622e-06	8.51448e-07	1.07095e-06	1.03623e-06	6.6441e-07	1.272e-06	1.13277e-06	5.44714e-07	8.95779e-07	5.82315e-07	1.33957e-06
ksynAkt	0.0015	0.00128302	0.00156807	0.00271782	0.00258033	0.000800386	0.00232	0.00150714	0.00282273	0.00283446	0.00219462	0.00138746	0.00232471	0.000810974	0.00226732	0.00238505	0.00296934	0.0012306	0.00146277	0.00189216	0.00111158	0.00281345	0.00091805	0.00185891	0.00291505	0.00167249	0.00207033	0.00110729	0.000927653	0.00151908	0.00134816	0.00299168	0.0012604	0.0020082	0.00200875	0.000942779	0.00183117	0.00135692	0.0029447	0.000946649	0.000862953	0.00163655	0.00196728	0.00122105	0.00283155	0.00241425	0.00167503	0.00203188	0.00146688
kbinAktHsp90	0.00037	0.000654682	0.0004098	0.000425873	0.000570673	0.000543082	0.00048829	0.000626358	0.00023643	0.000320263	0.000469126	0.00018898	0.000363189	0.00051132	0.000312417	0.000271763	0.000191911	0.000629548	0.000378622	0.000685788	0.000431634	0.000295972	0.000535454	0.000400136	0.000441635	0.000513673	0.000406175	0.000336766	0.000260944	0.000483778	0.000359511	0.000241817	0.000476502	0.000601179	0.00050129	0.000733485	0.000587408	0.000237694	0.000517576	0.00022567	0.000579254	0.000474533	0.00036623	0.000511004	0.000709029	0.000637134	0.000418855	0.000325033	0.000648189
krelAktHsp90	7	6.62429	6.5536	6.7645	4.42175	4.52248	4.67378	7.95318	4.62204	10.6325	4.80443	6.37426	5.91587	9.07924	13.6249	4.34508	3.58456	7.17009	4.29621	11.055	5.97589	8.4723	4.73703	10.2532	4.13879	8.40432	5.72641	5.68724	10.3504	11.8123	11.6844	7.04495	5.5608	11.715	5.5454	13.2281	13.2223	13.7187	5.31519	8.60276	6.63956	7.6841	11.3988	8.51036	11.4711	12.1538	13.992	4.64285	7.62983
kbinAktProt	6e-08	8.96727e-08	3.60325e-08	7.59427e-08	6.51512e-08	1.02568e-07	8.9105e-08	3.56674e-08	5.03873e-08	3.7728e-08	4.86556e-08	8.18876e-08	1.11403e-07	9.66308e-08	1.1941e-07	8.89998e-08	1.18132e-07	6.13495e-08	9.9596e-08	8.38781e-08	5.69904e-08	4.02609e-08	4.30764e-08	6.22142e-08	8.5643e-08	9.02302e-08	4.97964e-08	4.11542e-08	3.42164e-08	4.53593e-08	3.61797e-08	4.1309e-08	1.09135e-07	9.45074e-08	7.86214e-08	3.61062e-08	7.04712e-08	8.61719e-08	4.45083e-08	1.1367e-07	8.90146e-08	1.11955e-07	5.23508e-08	6.73296e-08	1.10596e-07	6.29913e-08	6.12626e-08	9.26899e-08	8.28137e-08
krelAktProt	1e-08	1.55323e-08	1.50918e-08	8.15251e-09	1.5656e-08	8.35052e-09	1.42192e-08	7.6345e-09	5.30299e-09	8.90116e-09	1.4939e-08	1.52514e-08	1.55881e-08	5.80401e-09	6.30155e-09	8.14153e-09	1.98941e-08	1.61171e-08	7.8825e-09	1.19955e-08	1.3705e-08	9.26194e-09	1.45245e-08	1.51499e-08	7.50513e-09	1.5174e-08	7.32896e-09	1.48148e-08	1.76074e-08	1.25067e-08	1.37251e-08	1.71839e-08	1.94543e-08	9.27339e-09	1.70048e-08	1.59663e-08	1.00275e-08	1.59693e-08	8.69434e-09	1.32978e-08	1.39647e-08	1.66133e-08	1.19086e-08	1.67392e-08	1.21046e-08	1.70187e-08	5.48007e-09	1.17085e-08	1.07141e-08
kdegAkt	0.01	0.0151338	0.00697028	0.0139818	0.00693828	0.00679146	0.0192939	0.00782084	0.0176521	0.014805	0.00529349	0.0103242	0.0187504	0.00626385	0.0183684	0.0102969	0.0185038	0.00782066	0.00844293	0.00810502	0.0154959	0.0174356	0.0111215	0.00751923	0.0123744	0.0110115	0.0156901	0.0141761	0.00709516	0.00636365	0.00667013	0.0163314	0.00576367	0.0085591	0.0189392	0.013176	0.00881544	0.0117577	0.0165117	0.0174496	0.00747692	0.00993701	0.01711	0.0139871	0.00879899	0.00664607	0.0137708	0.00701707	0.0131856
kbinCHIP	2e-07	2.37928e-07	1.70478e-07	2.04189e-07	1.1773e-07	3.85885e-07	1.79417e-07	3.71871e-07	3.22147e-07	2.16997e-07	2.24794e-07	2.13489e-07	3.07562e-07	3.73316e-07	2.22286e-07	2.75795e-07	2.40807e-07	1.07053e-07	1.97505e-07	3.42126e-07	3.72501e-07	2.82497e-07	3.37295e-07	3.97276e-07	2.11094e-07	1.70423e-07	3.97535e-07	1.46943e-07	2.99177e-07	3.90214e-07	2.31301e-07	1.76388e-07	2.92345e-07	2.00198e-07	1.52698e-07	3.56485e-07	1.89559e-07	3.64764e-07	3.96919e-07	3.5071e-07	1.03212e-07	3.25973e-07	2.32631e-07	1.13743e-07	2.74184e-07	2.69452e-07	2.30249e-07	2.84998e-07	2.65119e-07
krelCHIP	1e-08	1.26631e-08	1.35586e-08	1.23787e-08	1.79258e-08	1.92989e-08	5.63772e-09	1.69713e-08	1.78821e-08	1.63402e-08	7.02831e-09	1.4256e-08	1.64967e-08	9.67278e-09	1.53721e-08	1.42555e-08	1.62683e-08	1.61405e-08	1.39085e-08	1.05599e-08	1.64443e-08	1.96962e-08	5.85925e-09	1.46386e-08	1.69785e-08	1.79178e-08	1.26548e-08	6.65123e-09	1.29931e-08	1.27278e-08	7.08467e-09	1.18229e-08	1.77919e-08	1.1884e-08	8.2558e-09	6.89688e-09	5.98338e-09	6.37932e-09	8.30512e-09	1.75868e-08	1.65015e-08	1.66844e-08	1.75976e-08	1.65291e-08	1.10216e-08	9.42043e-09	6.79354e-09	8.51205e-09	1.2581e-08
ksynMkp1	1e-05	9.97964e-06	1.8836e-05	1.84738e-05	5.44348e-06	1.93262e-05	1.43385e-05	1.00084e-05	1.89064e-05	1.77049e-05	1.53069e-05	1.79156e-05	1.01902e-05	1.83851e-05	5.62532e-06	1.62533e-05	9.52074e-06	1.91712e-05	1.74301e-05	1.46056e-05	1.50387e-05	9.95665e-06	1.86556e-05	7.47714e-06	7.45735e-06	1.25137e-05	1.62617e-05	1.24321e-05	5.84774e-06	5.84856e-06	1.96425e-05	7.32384e-06	1.24796e-05	1.96142e-05	7.82474e-06	1.15577e-05	8.31544e-06	1.95025e-05	9.83449e-06	8.38999e-06	1.15662e-05	7.91874e-06	7.58449e-06	1.0666e-05	8.936e-06	1.73716e-05	1.10822e-05	1.11779e-05	1.80792e-05
kbinMkp1Prot	9.6e-09	1.87154e-08	1.14347e-08	9.89164e-09	1.03394e-08	1.59473e-08	9.67131e-09	1.15304e-08	1.10657e-08	1.5441e-08	7.31875e-09	1.84537e-08	1.07294e-08	1.02316e-08	1.33584e-08	1.87896e-08	1.03422e-08	8.99896e-09	1.10753e-08	1.64587e-08	1.07612e-08	4.95605e-09	1.10175e-08	1.89976e-08	1.55947e-08	6.29298e-09	1.19105e-08	1.17461e-08	8.26878e-09	9.62764e-09	1.46314e-08	1.87795e-08	1.75426e-08	5.71945e-09	6.96767e-09	1.62735e-08	1.27078e-08	5.42239e-09	1.60309e-08	6.59358e-09	1.25205e-08	5.97014e-09	1.72151e-08	7.20142e-09	1.76859e-08	1.43936e-08	1.06616e-08	1.34884e-08	1.86205e-08
kdegMkp1	0.01	0.0136877	0.00869024	0.0105213	0.0052696	0.0186784	0.0156696	0.0188006	0.0198661	0.00940646	0.0131554	0.0118752	0.00708062	0.0106871	0.0104378	0.0167739	0.013835	0.00572446	0.0116798	0.0109383	0.0130466	0.0190013	0.0147621	0.013939	0.0180102	0.017864	0.0168527	0.0145605	0.00826076	0.00950676	0.0133371	0.00937209	0.0156217	0.016696	0.0195243	0.00630786	0.0130939	0.0132282	0.0175778	0.0135833	0.0142796	0.00983876	0.0141911	0.0148924	0.00792839	0.0152242	0.0147673	0.0116014	0.00850278
kphosMkp1	0.02	0.0174868	0.0131008	0.0109354	0.0224911	0.012351	0.0271878	0.0149841	0.035759	0.0167871	0.0106422	0.0249311	0.0367461	0.0172714	0.0165176	0.0373745	0.0243203	0.020274	0.0105353	0.0267793	0.0233917	0.0172683	0.0341698	0.0367628	0.010638	0.0182159	0.0353707	0.0354759	0.029298	0.0366532	0.0372666	0.0105762	0.0337941	0.0353121	0.0138815	0.0248794	0.0311947	0.0186026	0.0211742	0.0277104	0.0271726	0.0313904	0.0200837	0.0194233	0.0356505	0.0143231	0.0305373	0.0134397	0.0263493
kdephosMkp1	0.001	0.000791102	0.00176351	0.00160883	0.0016404	0.000573703	0.000799227	0.00150217	0.00174709	0.00108665	0.0010381	0.00147123	0.00131545	0.000554445	0.00171113	0.000829801	0.00143344	0.00170793	0.000891481	0.000528169	0.00148522	0.000973228	0.000944331	0.000609197	0.000501524	0.00125805	0.00112333	0.000693116	0.000665464	0.00197411	0.00112511	0.000753327	0.00116681	0.00066719	0.00150657	0.00141917	0.000640068	0.00176155	0.000781506	0.00180601	0.00091753	0.000543832	0.000616051	0.000809913	0.00129578	0.00166687	0.000885381	0.00128729	0.00182003
kgenROSp38	0.0001	0.000104383	0.00012869	9.0871e-05	0.000132542	0.000140396	0.00019556	0.000142028	0.000101653	0.000150003	0.000180018	9.47061e-05	0.000178999	6.14073e-05	0.000134671	7.58919e-05	5.74568e-05	0.000144743	0.000175641	0.000192514	6.37789e-05	0.000196812	0.000193619	0.000149399	0.000171103	0.000193632	5.07104e-05	8.85256e-05	0.000183693	0.000140705	0.000100643	0.000180003	0.000178483	0.000161497	6.09148e-05	5.29861e-05	0.000112832	0.000185998	0.000156184	0.000114382	0.000179181	6.63229e-05	0.000168637	0.000153975	0.000112356	0.000156056	5.10289e-05	8.23627e-05	0.000171711
kdamHsp	1e-08	1.87143e-08	1.23889e-08	1.02181e-08	1.00092e-08	6.59223e-09	9.73883e-09	1.83334e-08	1.79555e-08	5.32984e-09	1.48096e-08	1.35834e-08	1.91781e-08	9.39198e-09	1.92558e-08	1.50145e-08	1.92236e-08	1.13668e-08	8.88973e-09	1.10653e-08	1.20267e-08	1.8817e-08	1.45951e-08	9.69337e-09	1.21067e-08	1.52079e-08	1.19765e-08	1.76938e-08	5.78075e-09	1.17709e-08	1.40344e-08	7.9115e-09	1.52259e-08	9.26522e-09	1.85472e-08	1.47991e-08	1.72675e-08	1.68656e-08	1.7764e-08	1.97701e-08	1.9954e-08	1.97776e-08	8.4955e-09	5.53238e-09	1.37355e-08	1.79519e-08	8.64082e-09	1.52661e-08	1.1091e-08
kp38death	1.5e-07	1.10256e-07	2.79137e-07	2.24184e-07	2.30324e-07	2.88478e-07	2.4144e-07	2.37566e-07	2.59511e-07	1.07823e-07	1.79151e-07	1.39821e-07	2.50568e-07	2.02988e-07	2.70967e-07	1.52222e-07	9.28206e-08	2.20942e-07	2.29788e-07	1.45478e-07	2.4978e-07	1.22995e-07	1.12424e-07	2.95103e-07	7.5323e-08	1.2979e-07	8.44862e-08	2.80193e-07	1.10727e-07	1.37223e-07	2.14095e-07	2.92902e-07	1.34214e-07	2.39693e-07	2.04733e-07	2.46943e-07	1.59099e-07	2.31157e-07	2.94755e-07	2.40391e-07	2.96735e-07	1.86639e-07	2.78811e-07	1.03849e-07	2.78328e-07	2.79502e-07	1.14056e-07	2.98173e-07	1.55148e-07
kJnkdeath	1.5e-07	1.63439e-07	1.33053e-07	2.21411e-07	2.74948e-07	2.46825e-07	8.66244e-08	2.19109e-07	2.99346e-07	2.02973e-07	2.41293e-07	1.7327e-07	1.22616e-07	2.81943e-07	2.08533e-07	1.13602e-07	2.85033e-07	2.64876e-07	2.77466e-07	2.52841e-07	1.86735e-07	1.02687e-07	1.96899e-07	2.87184e-07	2.10726e-07	1.55625e-07	8.04358e-08	7.56344e-08	1.30253e-07	7.94709e-08	2.72553e-07	1.02387e-07	2.20699e-07	9.02088e-08	1.86429e-07	1.85447e-07	1.80504e-07	2.40321e-07	7.62431e-08	2.88599e-07	1.52183e-07	9.60829e-08	1.8759e-07	2.16207e-07	9.44794e-08	2.2582e-07	7.57704e-08	1.86583e-07	1.60656e-07
kPIdeath	2e-08	1.08063e-08	2.33239e-08	3.52043e-08	2.06197e-08	3.38455e-08	3.82604e-08	3.28804e-08	2.8202e-08	3.90668e-08	3.98127e-08	2.12374e-08	2.88981e-08	3.90524e-08	1.96035e-08	2.70424e-08	2.23869e-08	2.57774e-08	1.60856e-08	2.12682e-08	3.96672e-08	3.25021e-08	1.94756e-08	1.86459e-08	3.6265e-08	3.27229e-08	3.53064e-08	2.09509e-08	1.74299e-08	3.81942e-08	1.46358e-08	1.86626e-08	3.11879e-08	1.84742e-08	1.80903e-08	2.98584e-08	3.0274e-08	1.99463e-08	2.9768e-08	1.57105e-08	1.69876e-08	3.77417e-08	3.9927e-08	1.47941e-08	1.34574e-08	1.07717e-08	3.29372e-08	3.85123e-08	2.95726e-08
[truncated: 2 more columns]

## Sheet: % difference in parameter value
	default	set 1	% difference	set 2	% difference	set 3	% difference	set 4	% difference	set 5	% difference	set 6	% difference	set 7	% difference	set 8	% difference	set9	%difference	set 10	%difference	set 11	%difference	set 12	%difference	set 13	%difference	set 14	%difference	set 15	%difference	set 16	%difference	set 17	%difference	set 18	%difference	set 19	%difference	set 20	%difference	set 21	%difference	set 22	%difference	set 23	%difference	set 24	%difference
ksynNatP	0.042	0.0719402	-71.2862	0.0485338	-15.5567	0.0367636	12.4677	0.0723495	-72.2607	0.0751385	-78.9011	0.0796349	-89.6069	0.0769163	-83.134	0.0568281	-35.305	0.0498796	-18.7609	0.0626723	-49.2199	0.0786416	-87.2419	0.0313783	25.2898	0.0606034	-44.2937	0.0688562	-63.9434	0.0667999	-59.0474	0.0475065	-13.1107	0.0336852	19.7971	0.0801757	-90.8945	0.0797162	-89.8005	0.069302	-65.0048	0.0699062	-66.4434	0.0429193	-2.18878	0.0249569	40.5789	0.0466408	-11.0495
kmisfold	2e-06	3.79517e-06	-89.7583	3.84754e-06	-92.3772	1.79616e-06	10.192	3.43382e-06	-71.6911	2.14025e-06	-7.01274	3.77125e-06	-88.5623	1.2487e-06	37.5651	2.47088e-06	-23.5442	3.84899e-06	-92.4496	1.22498e-06	38.751	1.01784e-06	49.1082	3.70135e-06	-85.0676	3.28074e-06	-64.0369	2.6076e-06	-30.3799	2.34849e-06	-17.4246	1.63795e-06	18.1027	2.84649e-06	-42.3247	3.7271e-06	-86.3552	1.79081e-06	10.4595	3.26549e-06	-63.2743	2.65698e-06	-32.8489	3.77773e-06	-88.8863	1.58703e-06	20.6486	1.52683e-06	23.6587
kbinMisPProt	1e-07	1.13681e-07	-13.6815	8.67511e-08	13.2489	1.18532e-07	-18.5323	1.80614e-07	-80.6144	8.32441e-08	16.7559	1.78303e-07	-78.303	7.59245e-08	24.0755	1.92407e-07	-92.4069	1.90593e-07	-90.5932	1.46326e-07	-46.3265	9.67518e-08	3.24818	1.41567e-07	-41.5669	1.70461e-07	-70.4613	1.71193e-07	-71.1931	7.8963e-08	21.037	1.4011e-07	-40.1103	1.69416e-07	-69.4162	1.81455e-07	-81.4549	1.83548e-07	-83.5483	9.98664e-08	0.13357	1.7145e-07	-71.4496	1.39913e-07	-39.9127	1.86782e-07	-86.7818	1.06413e-07	-6.41306
kdegMisP	0.01	0.0180644	-80.6442	0.0188786	-88.7864	0.0135027	-35.0266	0.018041	-80.4104	0.0112937	-12.9373	0.00891546	10.8454	0.0116028	-16.0276	0.00514531	48.5469	0.0156769	-56.7688	0.00638913	36.1087	0.0122691	-22.6914	0.01358	-35.8	0.0101983	-1.98315	0.0128118	-28.1185	0.018292	-82.92	0.0170568	-70.5684	0.0176355	-76.3552	0.0113333	-13.3327	0.0149284	-49.2839	0.00695064	30.4936	0.0176039	-76.0395	0.00504295	49.5705	0.0168635	-68.6353	0.00790923	20.9077
kagg	1e-08	6.80607e-09	31.9393	1.19911e-08	-19.9112	1.59249e-08	-59.2489	6.23143e-09	37.6857	1.68733e-08	-68.7334	1.5721e-08	-57.2099	1.13005e-08	-13.0049	6.75373e-09	32.4627	1.77354e-08	-77.3537	9.81077e-09	1.89233	7.31897e-09	26.8103	5.14304e-09	48.5696	1.34312e-08	-34.3119	1.11383e-08	-11.3829	1.01392e-08	-1.39247	1.00941e-08	-0.941239	1.73862e-08	-73.8623	1.00621e-08	-0.621239	1.68778e-08	-68.7777	9.5726e-09	4.27401	8.93545e-09	10.6455	1.92346e-08	-92.3462	8.09726e-09	19.0274	1.79367e-08	-79.3674
kseqagg	7e-07	5.0517e-07	27.8328	1.10454e-06	-57.7911	1.38276e-06	-97.5371	4.3519e-07	37.8301	4.3651e-07	37.6415	9.98888e-07	-42.6983	6.04763e-07	13.6052	1.23884e-06	-76.9767	4.9876e-07	28.7485	1.09878e-06	-56.969	7.93742e-07	-13.3917	3.83958e-07	45.1489	9.6175e-07	-37.3928	1.32417e-06	-89.1665	7.89366e-07	-12.7666	6.75685e-07	3.47351	5.13847e-07	26.5933	7.49472e-07	-7.06742	6.97341e-07	0.379803	6.51135e-07	6.98071	1.30546e-06	-86.494	5.0865e-07	27.3357	7.29399e-07	-4.19981	6.68472e-07	4.50404
kbinAggPProt	1e-05	1.73172e-05	-73.1723	8.70417e-06	12.9583	1.19531e-05	-19.5305	6.64355e-06	33.5645	1.93419e-05	-93.4186	1.61063e-05	-61.0631	1.83699e-05	-83.6988	6.89358e-06	31.0642	1.11074e-05	-11.0736	1.45506e-05	-45.506	1.34246e-05	-34.2463	1.56356e-05	-56.3562	9.63618e-06	3.63819	1.75255e-05	-75.2552	1.70218e-05	-70.2184	1.86102e-05	-86.1025	6.60923e-06	33.9077	1.80307e-05	-80.3072	1.37787e-05	-37.7872	5.34082e-06	46.5918	8.71005e-06	12.8995	1.11846e-05	-11.8465	6.7298e-06	32.702	5.99636e-06	40.0364
kbinHspMisp	8e-06	4.80526e-06	39.9343	1.54788e-05	-93.4851	1.17074e-05	-46.3423	9.26562e-06	-15.8203	1.41383e-05	-76.7284	1.54232e-05	-92.7899	1.41624e-05	-77.03	1.40768e-05	-75.9596	9.46449e-06	-18.3062	1.39439e-05	-74.2991	1.40287e-05	-75.3585	4.51934e-06	43.5082	7.53533e-06	5.80831	1.42403e-05	-78.0042	1.18107e-05	-47.6337	7.11098e-06	11.1128	5.10445e-06	36.1944	1.00069e-05	-25.0868	1.3689e-05	-71.1128	1.38747e-05	-73.4338	9.98916e-06	-24.8645	4.27629e-06	46.5464	6.44215e-06	19.4731	5.78095e-06	27.7382
krelHspMisp	8e-05	6.19488e-05	22.5641	8.27966e-05	-3.49581	0.000126089	-57.611	8.60411e-05	-7.55143	9.22091e-05	-15.2613	6.76745e-05	15.4069	8.31846e-05	-3.98069	0.000142148	-77.6848	0.00012571	-57.1375	6.2635e-05	21.7063	0.000126163	-57.7041	8.54546e-05	-6.81827	0.000113419	-41.7742	0.000136092	-70.1148	0.000134627	-68.2837	5.07869e-05	36.5163	0.000158993	-98.7417	0.000151622	-89.5269	0.000117987	-47.4832	0.000134562	-68.2028	6.32779e-05	20.9026	9.17821e-05	-14.7277	5.57089e-05	30.3639	0.000106919	-33.6484
krefold	0.00055	0.000320672	41.696	0.000375049	31.8093	0.000664973	-20.9043	0.000849039	-54.3708	0.000762686	-38.6702	0.000495339	9.93836	0.000394666	28.2426	0.000544815	0.942755	0.000566028	-2.9141	0.000745295	-35.5082	0.000994851	-80.882	0.000989067	-79.8303	0.000783294	-42.417	0.000370921	32.5598	0.000978259	-77.8653	0.000291172	47.0596	0.000379841	30.9379	0.00066571	-21.0382	0.00109402	-98.9121	0.000980555	-78.2827	0.000921786	-67.5975	0.000702832	-27.7877	0.000374542	31.9015	0.000328806	40.2171
kbinHsf1Hsp90	0.02	0.0388841	-94.4205	0.034533	-72.6651	0.0154663	22.6685	0.0123211	38.3943	0.0261584	-30.7919	0.0152712	23.6439	0.0350161	-75.0804	0.0371312	-85.6558	0.0107149	46.4257	0.0253379	-26.6895	0.0263913	-31.9567	0.0322459	-61.2295	0.033734	-68.6699	0.0190605	4.69774	0.0226185	-13.0925	0.0285632	-42.8161	0.0301769	-50.8845	0.0137526	31.2368	0.012951	35.2452	0.031507	-57.535	0.0170986	14.5072	0.0207651	-3.82559	0.0184449	7.77566	0.0316785	-58.3927
krelHsf1Hsp90	0.5	0.918628	-83.7256	0.692666	-38.5333	0.487453	2.5094	0.752413	-50.4825	0.266747	46.6507	0.40809	18.382	0.3289	34.22	0.894402	-78.8804	0.450965	9.807	0.502546	-0.509121	0.995798	-99.1596	0.400975	19.8049	0.360012	27.9977	0.322342	35.5316	0.660735	-32.147	0.813783	-62.7567	0.554015	-10.8029	0.986264	-97.2528	0.771999	-54.3999	0.394263	21.1474	0.61311	-22.622	0.312416	37.5167	0.313165	37.367	0.972928	-94.5856
kdimerHsf1	8e-05	0.000105111	-31.3886	0.000148225	-85.2814	0.000147866	-84.8328	9.08818e-05	-13.6022	0.000145338	-81.6723	0.000123264	-54.08	8.62293e-05	-7.78662	0.000145464	-81.8298	0.00015704	-96.3003	4.56284e-05	42.9645	8.57458e-05	-7.1822	5.61731e-05	29.7836	0.000123592	-54.4902	4.8433e-05	39.4587	0.000142922	-78.6524	0.00014228	-77.8506	0.00014833	-85.4123	7.61297e-05	4.83793	0.000150109	-87.6357	9.75433e-05	-21.9291	0.000104571	-30.7133	0.000156111	-95.1387	4.75781e-05	40.5274	6.54967e-05	18.1292
ktrimerHsf1	0.01	0.00988684	1.13164	0.00952713	4.72866	0.0186957	-86.9574	0.0161705	-61.7053	0.0178304	-78.3035	0.0050426	49.574	0.00765093	23.4907	0.0102986	-2.98619	0.0167562	-67.5616	0.0127644	-27.6435	0.00954028	4.59724	0.00647928	35.2072	0.019996	-99.9599	0.0108113	-8.11262	0.0109338	-9.33771	0.016061	-60.6098	0.00698709	30.1291	0.0163894	-63.8935	0.0124621	-24.6211	0.0166063	-66.0632	0.0120852	-20.8525	0.0082563	17.437	0.00971621	2.83786	0.00794186	20.5814
kdetrimerHsf1	0.5	0.386365	22.727	0.358783	28.2435	0.536242	-7.24848	0.379616	24.0769	0.729256	-45.8512	0.587677	-17.5355	0.433412	13.3175	0.511285	-2.25709	0.937211	-87.4421	0.97014	-94.028	0.385827	22.8345	0.579356	-15.8711	0.559135	-11.827	0.473208	5.35842	0.808063	-61.6125	0.933393	-86.6786	0.570777	-14.1553	0.389577	22.0847	0.394772	21.0455	0.941463	-88.2927	0.899204	-79.8407	0.613429	-22.6858	0.830263	-66.0526	0.506093	-1.21851
kdedimerHsf1	0.5	0.64612	-29.224	0.862283	-72.4566	0.685148	-37.0296	0.580385	-16.077	0.270356	45.9288	0.854763	-70.9525	0.873174	-74.6349	0.643248	-28.6496	0.652498	-30.4996	0.525382	-5.07646	0.897867	-79.5733	0.520156	-4.03121	0.680929	-36.1859	0.400627	19.8746	0.543642	-8.72837	0.657211	-31.4421	0.42076	15.848	0.81942	-63.8841	0.257188	48.5623	0.274994	45.0013	0.302735	39.453	0.74984	-49.9681	0.705406	-41.0812	0.900966	-80.1931
kbinHSEHsf1	0.05	0.0373489	25.3022	0.0420138	15.9724	0.0981174	-96.2348	0.0880693	-76.1385	0.0437118	12.5764	0.0825147	-65.0293	0.0321499	35.7003	0.026631	46.7381	0.0622211	-24.4422	0.0990151	-98.0302	0.0966161	-93.2321	0.0948317	-89.6635	0.0951841	-90.3681	0.0824165	-64.8331	0.0535979	-7.19589	0.0509033	-1.80669	0.0254419	49.1162	0.0868588	-73.7175	0.0448526	10.2948	0.0481343	3.7314	0.0382627	23.4745	0.0576075	-15.2151	0.0946182	-89.2364	0.053067	-6.13407
krelHSEHsf1	0.08	0.144192	-80.2395	0.0758893	5.13839	0.150861	-88.5769	0.154802	-93.5019	0.0941963	-17.7454	0.0521986	34.7517	0.0408246	48.9692	0.123466	-54.332	0.0733487	8.31412	0.0949342	-18.6678	0.129459	-61.8232	0.0825441	-3.18007	0.0873173	-9.14665	0.14438	-80.4755	0.153993	-92.4911	0.0407256	49.093	0.103271	-29.0889	0.140734	-75.9176	0.134412	-68.0148	0.0705149	11.8563	0.145966	-82.4574	0.0655082	18.1148	0.0538621	32.6724	0.0565133	29.3584
kupregHsp	0.2	0.241372	-20.6862	0.353142	-76.5709	0.183693	8.15371	0.313926	-56.963	0.208485	-4.2425	0.394629	-97.3144	0.368855	-84.4273	0.256483	-28.2417	0.276377	-38.1886	0.218637	-9.31829	0.317769	-58.8843	0.16366	18.1698	0.23423	-17.1152	0.376638	-88.3192	0.368002	-84.0011	0.120544	39.7279	0.164298	17.851	0.301677	-50.8385	0.316148	-58.074	0.261031	-30.5153	0.129356	35.3218	0.257158	-28.579	0.231558	-15.7789	0.237538	-18.7689
kbasalsynHsp70	0.008	0.00529983	33.7521	0.00906423	-13.3029	0.00937441	-17.1802	0.0138942	-73.6773	0.00826372	-3.29647	0.0106819	-33.5235	0.00552354	30.9558	0.00904855	-13.1069	0.00874543	-9.31789	0.00971443	-21.4303	0.0079274	0.907508	0.0151611	-89.514	0.0136562	-70.7019	0.00660707	17.4117	0.0122899	-53.6238	0.0107261	-34.0763	0.00822429	-2.80357	0.0131345	-64.1807	0.0130915	-63.6441	0.0157878	-97.3476	0.0062764	21.545	0.00408376	48.953	0.0106946	-33.6831	0.00428114	46.4858
kbasalsynHsp90	0.008	0.00590654	26.1682	0.0155036	-93.7947	0.00432241	45.9699	0.0116259	-45.3232	0.0137341	-71.6757	0.00524676	34.4155	0.0121082	-51.3527	0.00971245	-21.4056	0.00497604	37.7995	0.0146775	-83.4689	0.00576587	27.9267	0.0142428	-78.035	0.00656253	17.9683	0.0130816	-63.5204	0.0114336	-42.9197	0.0139583	-74.4784	0.0121035	-51.2942	0.0121023	-51.2784	0.00548613	31.4234	0.0130924	-63.6554	0.0122724	-53.4052	0.0056663	29.1712	0.0103379	-29.224	0.0115488	-44.3605
kbinHsp70Prot	1.2e-08	8.56115e-09	28.6571	1.86042e-08	-55.0346	7.41035e-09	38.2471	2.37242e-08	-97.7013	1.62936e-08	-35.7797	6.00567e-09	49.9528	1.83776e-08	-53.1469	6.33477e-09	47.2103	2.28411e-08	-90.3426	1.25626e-08	-4.68795	1.13722e-08	5.23178	7.84283e-09	34.6431	1.42598e-08	-18.8318	1.41807e-08	-18.1724	1.69928e-08	-41.6064	1.55368e-08	-29.473	7.72615e-09	35.6154	1.89686e-08	-58.0713	1.85768e-08	-54.8065	1.72704e-08	-43.9201	1.52586e-08	-27.1549	1.18932e-08	0.890328	1.2856e-08	-7.1337	1.13254e-08	5.62142
kbinHsp90Prot	1e-08	1.37994e-08	-37.994	1.2314e-08	-23.1399	9.01835e-09	9.81646	1.66409e-08	-66.4087	1.41274e-08	-41.2742	1.06853e-08	-6.85304	1.46711e-08	-46.7109	7.83329e-09	21.6671	9.15898e-09	8.41019	1.2011e-08	-20.1096	1.7192e-08	-71.9198	6.71388e-09	32.8612	1.845e-08	-84.5	9.12882e-09	8.71178	1.18153e-08	-18.1529	7.2602e-09	27.398	9.8917e-09	1.08302	1.09029e-08	-9.0293	1.25675e-08	-25.6751	1.10863e-08	-10.8631	8.44945e-09	15.5055	7.96518e-09	20.3482	9.16268e-09	8.37317	1.81988e-08	-81.9879
kdegHsp70	0.01	0.0157158	-57.1582	0.0160243	-60.2433	0.00791664	20.8336	0.0164106	-64.1065	0.0067573	32.427	0.00626137	37.3863	0.0103175	-3.17492	0.0179654	-79.6545	0.0100127	-0.126962	0.00855739	14.4261	0.0127445	-27.4449	0.0179348	-79.3484	0.00531814	46.8186	0.00609545	39.0455	0.00869966	13.0034	0.0167204	-67.2038	0.0186735	-86.735	0.0172859	-72.8589	0.00738794	26.1206	0.0152089	-52.0889	0.00502383	49.7617	0.0189628	-89.6281	0.00529683	47.0317	0.015761	-57.6099
kdegHsp90	0.01	0.0151502	-51.5017	0.00614928	38.5072	0.0157402	-57.402	0.0055682	44.318	0.013433	-34.3304	0.014512	-45.1197	0.0182949	-82.9486	0.018307	-83.0701	0.0196065	-96.0651	0.0177344	-77.344	0.00546415	45.3585	0.0136438	-36.4377	0.00559876	44.0124	0.0181925	-81.9246	0.00808975	19.1025	0.0164652	-64.6521	0.00927946	7.20539	0.00694666	30.5334	0.00563333	43.6667	0.0159648	-59.6482	0.0174459	-74.4588	0.00739232	26.0768	0.00833299	16.6701	0.0197943	-97.9426
kgenROS	0.01	0.0134542	-34.5417	0.00544563	45.5437	0.00778985	22.1015	0.0127934	-27.9344	0.0176537	-76.5374	0.0174398	-74.3979	0.0115599	-15.5989	0.0133701	-33.7009	0.00774151	22.5849	0.00778171	22.1829	0.0138292	-38.2915	0.00751383	24.8617	0.00532912	46.7088	0.0179042	-79.0422	0.0160085	-60.0855	0.0101717	-1.71653	0.0183097	-83.0966	0.00835786	16.4214	0.01484	-48.3996	0.0116149	-16.1485	0.00977842	2.21575	0.0175447	-75.4474	0.0111855	-11.8545	0.0138113	-38.1133
kremROS	0.001	0.00163267	-63.2671	0.00116583	-16.5834	0.00128135	-28.1353	0.0019461	-94.6096	0.00119721	-19.7212	0.00101033	-1.03343	0.00195691	-95.6915	0.00158085	-58.0854	0.000512779	48.7221	0.000682684	31.7316	0.00182351	-82.3511	0.000719086	28.0914	0.000651998	34.8002	0.00169715	-69.7153	0.00170863	-70.8631	0.000933721	6.62791	0.000838989	16.1011	0.0012931	-29.3097	0.000572657	42.7343	0.00150018	-50.018	0.00126285	-26.2854	0.00134886	-34.8856	0.00146016	-46.0158	0.00182686	-82.6856
kbinHsp70client	0.0002	0.000343136	-71.5679	0.000240458	-20.229	0.000114326	42.837	0.000285912	-42.956	0.000188018	5.99124	0.000164425	17.7875	0.000347668	-73.8341	0.000306644	-53.3219	0.000395827	-97.9133	0.000274036	-37.0178	0.000143301	28.3493	0.000160344	19.828	0.000147537	26.2316	0.000323092	-61.546	0.000328885	-64.4427	0.000382037	-91.0185	0.000262311	-31.1554	0.00031417	-57.0851	0.000111278	44.3608	0.000237983	-18.9915	0.000367077	-83.5383	0.000251353	-25.6765	0.000231047	-15.5236	0.000360383	-80.1917
krelHsp70client	5	2.64721	47.0558	4.33617	13.2765	3.7841	24.3179	8.7474	-74.948	7.40019	-48.0039	5.47793	-9.55856	2.67184	46.5631	6.26169	-25.2339	6.40922	-28.1844	8.68593	-73.7186	7.12909	-42.5818	5.40686	-8.1372	6.3344	-26.6881	5.33193	-6.63851	4.07159	18.5681	8.63272	-72.6543	7.2836	-45.672	3.66004	26.7993	2.63848	47.2304	8.73574	-74.7149	4.0473	19.0541	2.56625	48.6751	4.88617	2.27657	4.9523	0.954041
kbinHsp90client	0.0002	0.00022126	-10.6301	0.000207466	-3.7331	0.00035654	-78.27	0.000171106	14.4471	0.000312627	-56.3134	0.000184151	7.92441	0.000229192	-14.5959	0.000355051	-77.5254	0.000191888	4.05597	0.000315009	-57.5043	0.000185925	7.03772	0.0003888	-94.4002	0.000335791	-67.8955	0.000218936	-9.46799	0.00029137	-45.6848	0.000253806	-26.9032	0.000239673	-19.8366	0.000205867	-2.93328	0.000386877	-93.4385	0.000203534	-1.76709	0.000185249	7.37558	0.000386869	-93.4347	0.000375737	-87.8683	0.000212602	-6.30115
krelHsp90client	5	2.53792	49.2415	9.28697	-85.7394	2.91591	41.6817	6.98901	-39.7803	5.21467	-4.29343	8.1551	-63.102	8.42473	-68.4946	2.69051	46.1899	8.3264	-66.5279	3.26744	34.6511	4.51477	9.70459	5.43871	-8.7742	6.09548	-21.9097	9.859	-97.18	8.47395	-69.4789	3.87681	22.4639	4.26044	14.7912	5.08318	-1.66358	6.57791	-31.5582	7.76568	-55.3135	7.39234	-47.8468	7.36623	-47.3246	8.28574	-65.7147	2.77333	44.5335
kphosJnk	0.02	0.0318567	-59.2835	0.0134784	32.6078	0.0225089	-12.5446	0.024467	-22.335	0.0369228	-84.614	0.0284679	-42.3393	0.0389015	-94.5076	0.0371138	-85.5689	0.0215159	-7.57928	0.0295889	-47.9446	0.0341881	-70.9405	0.0187241	6.37969	0.0343449	-71.7243	0.0317641	-58.8206	0.0163441	18.2797	0.0118108	40.9458	0.0284158	-42.0792	0.025626	-28.1299	0.0183113	8.44349	0.0116177	41.9115	0.0271789	-35.8946	0.0110409	44.7956	0.0329464	-64.7321	0.0275494	-37.7471
kdephosJnkMkp1	0.05	0.0316823	36.6355	0.0445036	10.9927	0.0366952	26.6097	0.0976982	-95.3963	0.0594403	-18.8806	0.0730335	-46.067	0.0908788	-81.7577	0.0260077	47.9846	0.0610027	-22.0054	0.0323275	35.3451	0.04834	3.32005	0.0503794	-0.75884	0.0544567	-8.91344	0.061905	-23.8099	0.0868462	-73.6924	0.090641	-81.2819	0.0380586	23.8828	0.0383263	23.3473	0.036593	26.8141	0.0603912	-20.7824	0.0475025	4.99504	0.0836378	-67.2756	0.0899323	-79.8646	0.0405261	18.9477
kbinHsp70Ppx	0.2	0.348957	-74.4786	0.361543	-80.7714	0.265177	-32.5887	0.335104	-67.552	0.31332	-56.66	0.392924	-96.4618	0.131065	34.4677	0.101327	49.3367	0.201071	-0.535453	0.114884	42.558	0.296693	-48.3464	0.150976	24.5122	0.262114	-31.057	0.239574	-19.7872	0.13511	32.445	0.355837	-77.9183	0.349474	-74.7369	0.101912	49.0441	0.355081	-77.5406	0.101382	49.3091	0.131902	34.0489	0.243365	-21.6823	0.180749	9.62526	0.303196	-51.5982
krelHsp70Ppx	5	9.14258	-82.8515	7.38063	-47.6127	9.21496	-84.2992	8.49518	-69.9035	5.90073	-18.0146	5.37048	-7.40954	8.82417	-76.4834	3.0235	39.53	3.05296	38.9408	7.07598	-41.5196	7.51765	-50.353	8.00005	-60.0009	7.95831	-59.1661	3.80098	23.9804	2.80347	43.9306	7.24741	-44.9481	8.77593	-75.5185	3.0567	38.866	5.82022	-16.4044	6.11165	-22.2329	7.76201	-55.2402	4.77668	4.46644	7.03238	-40.6476	7.62984	-52.5968
kphosHsf1	0.03	0.0477894	-59.2979	0.0550015	-83.3383	0.0456261	-52.087	0.0500634	-66.8781	0.0551481	-83.8269	0.0159585	46.8049	0.0364594	-21.5313	0.0595197	-98.3989	0.0437753	-45.9177	0.0323723	-7.90754	0.0265526	11.4912	0.0195748	34.7508	0.0231061	22.9797	0.0344049	-14.6831	0.0195387	34.871	0.0532097	-77.3656	0.0359107	-19.7022	0.0460166	-53.3886	0.0319354	-6.45118	0.0541629	-80.543	0.0258784	13.7387	0.0567651	-89.2169	0.0386836	-28.9453	0.0438499	-46.1663
kdephosHsf1	0.01	0.0051296	48.704	0.00822274	17.7726	0.0123135	-23.1345	0.00970891	2.91092	0.0100771	-0.770742	0.0151579	-51.5789	0.018302	-83.0204	0.0178392	-78.3918	0.00553181	44.6819	0.00680243	31.9757	0.0137789	-37.7889	0.0057743	42.257	0.0127393	-27.3933	0.0161815	-61.8146	0.0113486	-13.4857	0.0144828	-44.828	0.00950654	4.93458	0.0174739	-74.7392	0.00521381	47.8619	0.0066971	33.029	0.0126224	-26.2241	0.0172665	-72.6646	0.0120668	-20.6682	0.0121236	-21.2355
kbinHSEPhosTriH	0.1	0.127912	-27.9118	0.198088	-98.0885	0.0757344	24.2656	0.137993	-37.9929	0.105	-5.0002	0.0793	20.7	0.19531	-95.3104	0.162779	-62.7789	0.11702	-17.0202	0.112688	-12.6876	0.0620228	37.9772	0.111965	-11.9653	0.118315	-18.315	0.127013	-27.0126	0.158011	-58.0108	0.195066	-95.0657	0.196155	-96.1555	0.0811177	18.8823	0.175888	-75.8884	0.18251	-82.5099	0.126774	-26.7744	0.123995	-23.9954	0.0829731	17.0269	0.133408	-33.4081
krelHSEPhosTriH	0.08	0.155817	-94.7718	0.146958	-83.6978	0.0894373	-11.7966	0.0620899	22.3877	0.118493	-48.1168	0.0648682	18.9147	0.0448764	43.9045	0.129521	-61.901	0.133699	-67.1241	0.122243	-52.8037	0.107431	-34.2889	0.156495	-95.619	0.0897641	-12.2052	0.0559962	30.0047	0.138892	-73.6145	0.139416	-74.2695	0.134777	-68.4708	0.0815649	-1.95607	0.10985	-37.3122	0.12758	-59.4748	0.0795411	0.573581	0.099726	-24.6575	0.136052	-70.0645	0.105703	-32.1283
kphosp38	0.02	0.018941	5.29503	0.0228075	-14.0373	0.0122717	38.6417	0.0323019	-61.5094	0.0300815	-50.4075	0.0361319	-80.6596	0.0240228	-20.1138	0.0397858	-98.9289	0.0220581	-10.2907	0.0100622	49.6891	0.0288587	-44.2933	0.039948	-99.7398	0.0383097	-91.5484	0.0144203	27.8983	0.0200097	-0.0486728	0.0269105	-34.5527	0.01589	20.55	0.0145805	27.0973	0.0204175	-2.08766	0.0142316	28.8421	0.0234597	-17.2986	0.0132556	33.7222	0.0293548	-46.7741	0.0399967	-99.9834
kdephosp38Mkp1	0.05	0.0601602	-20.3203	0.0350415	29.917	0.0846058	-69.2115	0.0840361	-68.0721	0.0563007	-12.6015	0.0976661	-95.3322	0.03495	30.1	0.0773371	-54.6742	0.0749584	-49.9168	0.0599475	-19.895	0.0986508	-97.3017	0.0320387	35.9226	0.0302008	39.5985	0.0490781	1.84373	0.0995797	-99.1595	0.0751812	-50.3625	0.0499273	0.145462	0.0845329	-69.0658	0.0734672	-46.9344	0.0563142	-12.6283	0.0343172	31.3656	0.053095	-6.19009	0.0632044	-26.4088	0.0352994	29.4013
kgenROSAggP	1e-06	7.32024e-07	26.7976	1.47594e-06	-47.5938	1.75467e-06	-75.4674	1.90019e-06	-90.0188	1.41456e-06	-41.4564	1.8515e-06	-85.1498	8.60077e-07	13.9923	1.66778e-06	-66.7778	1.24597e-06	-24.5968	1.53795e-06	-53.7946	1.06176e-06	-6.17599	1.80771e-06	-80.7708	1.64182e-06	-64.1822	8.99656e-07	10.0344	1.16675e-06	-16.6754	1.82869e-06	-82.869	7.62875e-07	23.7125	1.92834e-06	-92.8344	1.17881e-06	-17.881	7.67705e-07	23.2295	1.80569e-06	-80.5688	1.49307e-06	-49.3075	1.72891e-06	-72.8913	5.19222e-07	48.0778
ksynAkt	0.0015	0.00128302	14.4652	0.00156807	-4.53814	0.00271782	-81.1881	0.00258033	-72.0222	0.000800386	46.6409	0.00232	-54.6664	0.00150714	-0.475832	0.00282273	-88.1818	0.00283446	-88.9641	0.00219462	-46.3077	0.00138746	7.50286	0.00232471	-54.9809	0.000810974	45.9351	0.00226732	-51.1544	0.00238505	-59.0032	0.00296934	-97.9563	0.0012306	17.9603	0.00146277	2.48214	0.00189216	-26.1437	0.00111158	25.8944	0.00281345	-87.5636	0.00091805	38.7967	0.00185891	-23.927	0.00291505	-94.3366
kbinAktHsp90	0.00037	0.000654682	-76.941	0.0004098	-10.7567	0.000425873	-15.1009	0.000570673	-54.236	0.000543082	-46.7788	0.00048829	-31.9702	0.000626358	-69.2859	0.00023643	36.1001	0.000320263	13.4425	0.000469126	-26.7908	0.00018898	48.9242	0.000363189	1.84069	0.00051132	-38.1947	0.000312417	15.563	0.000271763	26.5505	0.000191911	48.1322	0.000629548	-70.1481	0.000378622	-2.33035	0.000685788	-85.3481	0.000431634	-16.6577	0.000295972	20.0076	0.000535454	-44.7173	0.000400136	-8.14478	0.000441635	-19.3607
krelAktHsp90	7	6.62429	5.36733	6.5536	6.37715	6.7645	3.36425	4.42175	36.8321	4.52248	35.3931	4.67378	33.2318	7.95318	-13.6169	4.62204	33.9709	10.6325	-51.8931	4.80443	31.3653	6.37426	8.93911	5.91587	15.4875	9.07924	-29.7034	13.6249	-94.6418	4.34508	37.9275	3.58456	48.792	7.17009	-2.42987	4.29621	38.6256	11.055	-57.9287	5.97589	14.6301	8.4723	-21.0329	4.73703	32.3281	10.2532	-46.4745	4.13879	40.8745
kbinAktProt	6e-08	8.96727e-08	-49.4545	3.60325e-08	39.9459	7.59427e-08	-26.5712	6.51512e-08	-8.58529	1.02568e-07	-70.9464	8.9105e-08	-48.5083	3.56674e-08	40.5544	5.03873e-08	16.0212	3.7728e-08	37.12	4.86556e-08	18.9073	8.18876e-08	-36.4793	1.11403e-07	-85.6714	9.66308e-08	-61.0513	1.1941e-07	-99.0166	8.89998e-08	-48.3329	1.18132e-07	-96.8865	6.13495e-08	-2.24911	9.9596e-08	-65.9933	8.38781e-08	-39.7968	5.69904e-08	5.01602	4.02609e-08	32.8984	4.30764e-08	28.206	6.22142e-08	-3.69027	8.5643e-08	-42.7384
krelAktProt	1e-08	1.55323e-08	-55.323	1.50918e-08	-50.9177	8.15251e-09	18.4749	1.5656e-08	-56.5597	8.35052e-09	16.4948	1.42192e-08	-42.1918	7.6345e-09	23.655	5.30299e-09	46.9701	8.90116e-09	10.9884	1.4939e-08	-49.3902	1.52514e-08	-52.5142	1.55881e-08	-55.8814	5.80401e-09	41.9599	6.30155e-09	36.9845	8.14153e-09	18.5847	1.98941e-08	-98.9413	1.61171e-08	-61.1708	7.8825e-09	21.175	1.19955e-08	-19.9551	1.3705e-08	-37.0496	9.26194e-09	7.38058	1.45245e-08	-45.2454	1.51499e-08	-51.4987	7.50513e-09	24.9487
kdegAkt	0.01	0.0151338	-51.3376	0.00697028	30.2972	0.0139818	-39.8176	0.00693828	30.6172	0.00679146	32.0854	0.0192939	-92.9386	0.00782084	21.7916	0.0176521	-76.5209	0.014805	-48.0502	0.00529349	47.0651	0.0103242	-3.24201	0.0187504	-87.5036	0.00626385	37.3615	0.0183684	-83.6843	0.0102969	-2.96942	0.0185038	-85.0376	0.00782066	21.7934	0.00844293	15.5707	0.00810502	18.9498	0.0154959	-54.9588	0.0174356	-74.3556	0.0111215	-11.2148	0.00751923	24.8077	0.0123744	-23.7443
kbinCHIP	2e-07	2.37928e-07	-18.9642	1.70478e-07	14.7611	2.04189e-07	-2.09445	1.1773e-07	41.1351	3.85885e-07	-92.9423	1.79417e-07	10.2917	3.71871e-07	-85.9357	3.22147e-07	-61.0735	2.16997e-07	-8.49846	2.24794e-07	-12.3969	2.13489e-07	-6.74457	3.07562e-07	-53.7811	3.73316e-07	-86.6578	2.22286e-07	-11.143	2.75795e-07	-37.8974	2.40807e-07	-20.4037	1.07053e-07	46.4733	1.97505e-07	1.24738	3.42126e-07	-71.0629	3.72501e-07	-86.2506	2.82497e-07	-41.2485	3.37295e-07	-68.6473	3.97276e-07	-98.6381	2.11094e-07	-5.54697
krelCHIP	1e-08	1.26631e-08	-26.6313	1.35586e-08	-35.5862	1.23787e-08	-23.7869	1.79258e-08	-79.2577	1.92989e-08	-92.989	5.63772e-09	43.6228	1.69713e-08	-69.7131	1.78821e-08	-78.8207	1.63402e-08	-63.4024	7.02831e-09	29.7169	1.4256e-08	-42.5605	1.64967e-08	-64.9667	9.67278e-09	3.27224	1.53721e-08	-53.7205	1.42555e-08	-42.5548	1.62683e-08	-62.6829	1.61405e-08	-61.4047	1.39085e-08	-39.0847	1.05599e-08	-5.59881	1.64443e-08	-64.4429	1.96962e-08	-96.9623	5.85925e-09	41.4075	1.46386e-08	-46.3859	1.69785e-08	-69.7852
ksynMkp1	1e-05	9.97964e-06	0.203642	1.8836e-05	-88.3597	1.84738e-05	-84.7382	5.44348e-06	45.5652	1.93262e-05	-93.2623	1.43385e-05	-43.3854	1.00084e-05	-0.0836497	1.89064e-05	-89.0636	1.77049e-05	-77.0493	1.53069e-05	-53.0687	1.79156e-05	-79.1555	1.01902e-05	-1.90156	1.83851e-05	-83.8506	5.62532e-06	43.7468	1.62533e-05	-62.5326	9.52074e-06	4.79258	1.91712e-05	-91.7124	1.74301e-05	-74.3014	1.46056e-05	-46.0564	1.50387e-05	-50.3865	9.95665e-06	0.433547	1.86556e-05	-86.5557	7.47714e-06	25.2286	7.45735e-06	25.4265
kbinMkp1Prot	9.6e-09	1.87154e-08	-94.9523	1.14347e-08	-19.1109	9.89164e-09	-3.03789	1.03394e-08	-7.70227	1.59473e-08	-66.1177	9.67131e-09	-0.742811	1.15304e-08	-20.1082	1.10657e-08	-15.2682	1.5441e-08	-60.8435	7.31875e-09	23.763	1.84537e-08	-92.2261	1.07294e-08	-11.7643	1.02316e-08	-6.57936	1.33584e-08	-39.15	1.87896e-08	-95.7249	1.03422e-08	-7.73133	8.99896e-09	6.26083	1.10753e-08	-15.368	1.64587e-08	-71.4452	1.07612e-08	-12.0959	4.95605e-09	48.3744	1.10175e-08	-14.7657	1.89976e-08	-97.8913	1.55947e-08	-62.4449
kdegMkp1	0.01	0.0136877	-36.8771	0.00869024	13.0976	0.0105213	-5.21299	0.0052696	47.304	0.0186784	-86.784	0.0156696	-56.6964	0.0188006	-88.0059	0.0198661	-98.661	0.00940646	5.93538	0.0131554	-31.554	0.0118752	-18.752	0.00708062	29.1938	0.0106871	-6.87097	0.0104378	-4.37787	0.0167739	-67.7392	0.013835	-38.3505	0.00572446	42.7554	0.0116798	-16.7976	0.0109383	-9.38339	0.0130466	-30.4662	0.0190013	-90.0126	0.0147621	-47.6205	0.013939	-39.3904	0.0180102	-80.1017
kphosMkp1	0.02	0.0174868	12.5662	0.0131008	34.4959	0.0109354	45.3229	0.0224911	-12.4555	0.012351	38.2452	0.0271878	-35.9388	0.0149841	25.0793	0.035759	-78.7948	0.0167871	16.0645	0.0106422	46.7888	0.0249311	-24.6554	0.0367461	-83.7306	0.0172714	13.6432	0.0165176	17.4122	0.0373745	-86.8724	0.0243203	-21.6016	0.020274	-1.37003	0.0105353	47.3234	0.0267793	-33.8965	0.0233917	-16.9584	0.0172683	13.6584	0.0341698	-70.8488	0.0367628	-83.8141	0.010638	46.8098
kdephosMkp1	0.001	0.000791102	20.8898	0.00176351	-76.3513	0.00160883	-60.8834	0.0016404	-64.0396	0.000573703	42.6297	0.000799227	20.0773	0.00150217	-50.2172	0.00174709	-74.7086	0.00108665	-8.66499	0.0010381	-3.81033	0.00147123	-47.1231	0.00131545	-31.5454	0.000554445	44.5555	0.00171113	-71.1131	0.000829801	17.0199	0.00143344	-43.3436	0.00170793	-70.793	0.000891481	10.8519	0.000528169	47.1831	0.00148522	-48.5218	0.000973228	2.67716	0.000944331	5.5669	0.000609197	39.0803	0.000501524	49.8476
kgenROSp38	0.0001	0.000104383	-4.38253	0.00012869	-28.6896	9.0871e-05	9.12898	0.000132542	-32.5422	0.000140396	-40.3965	0.00019556	-95.5605	0.000142028	-42.0283	0.000101653	-1.65347	0.000150003	-50.0032	0.000180018	-80.0177	9.47061e-05	5.29386	0.000178999	-78.9994	6.14073e-05	38.5927	0.000134671	-34.6709	7.58919e-05	24.1081	5.74568e-05	42.5432	0.000144743	-44.7428	0.000175641	-75.6408	0.000192514	-92.5144	6.37789e-05	36.2211	0.000196812	-96.8123	0.000193619	-93.6192	0.000149399	-49.3987	0.000171103	-71.1029
kdamHsp	1e-08	1.87143e-08	-87.1434	1.23889e-08	-23.8889	1.02181e-08	-2.18095	1.00092e-08	-0.0918561	6.59223e-09	34.0777	9.73883e-09	2.61169	1.83334e-08	-83.3344	1.79555e-08	-79.5547	5.32984e-09	46.7016	1.48096e-08	-48.0956	1.35834e-08	-35.8339	1.91781e-08	-91.7809	9.39198e-09	6.08023	1.92558e-08	-92.5577	1.50145e-08	-50.1449	1.92236e-08	-92.236	1.13668e-08	-13.6678	8.88973e-09	11.1027	1.10653e-08	-10.6534	1.20267e-08	-20.2668	1.8817e-08	-88.1696	1.45951e-08	-45.9509	9.69337e-09	3.06629	1.21067e-08	-21.0672
kp38death	1.5e-07	1.10256e-07	26.4963	2.79137e-07	-86.0911	2.24184e-07	-49.456	2.30324e-07	-53.5494	2.88478e-07	-92.3188	2.4144e-07	-60.9599	2.37566e-07	-58.3774	2.59511e-07	-73.007	1.07823e-07	28.118	1.79151e-07	-19.434	1.39821e-07	6.78603	2.50568e-07	-67.045	2.02988e-07	-35.3253	2.70967e-07	-80.6448	1.52222e-07	-1.48137	9.28206e-08	38.1196	2.20942e-07	-47.2947	2.29788e-07	-53.1917	1.45478e-07	3.01469	2.4978e-07	-66.5198	1.22995e-07	18.0036	1.12424e-07	25.0508	2.95103e-07	-96.7354	7.5323e-08	49.7847
kJnkdeath	1.5e-07	1.63439e-07	-8.95914	1.33053e-07	11.2981	2.21411e-07	-47.6072	2.74948e-07	-83.2989	2.46825e-07	-64.55	8.66244e-08	42.2504	2.19109e-07	-46.0725	2.99346e-07	-99.5639	2.02973e-07	-35.3152	2.41293e-07	-60.8622	1.7327e-07	-15.5133	1.22616e-07	18.2558	2.81943e-07	-87.9617	2.08533e-07	-39.0222	1.13602e-07	24.2656	2.85033e-07	-90.0222	2.64876e-07	-76.5839	2.77466e-07	-84.9776	2.52841e-07	-68.5606	1.86735e-07	-24.49	1.02687e-07	31.5418	1.96899e-07	-31.2663	2.87184e-07	-91.4561	2.10726e-07	-40.4838
kPIdeath	2e-08	1.08063e-08	45.9684	2.33239e-08	-16.6196	3.52043e-08	-76.0213	2.06197e-08	-3.09825	3.38455e-08	-69.2277	3.82604e-08	-91.3022	3.28804e-08	-64.402	2.8202e-08	-41.01	3.90668e-08	-95.3341	3.98127e-08	-99.0635	2.12374e-08	-6.18691	2.88981e-08	-44.4906	3.90524e-08	-95.2618	1.96035e-08	1.98239	2.70424e-08	-35.2118	2.23869e-08	-11.9347	2.57774e-08	-28.8871	1.60856e-08	19.572	2.12682e-08	-6.34094	3.96672e-08	-98.3358	3.25021e-08	-62.5106	1.94756e-08	2.62211	1.86459e-08	6.77052	3.6265e-08	-81.325
Cells highlighted in yellow correspond to parameters which are most sensitive in the model
Cells highlighted in green correspond to parameters which are more than 70% greater than the default value
Cells highlighted in red correspond to parameters which are more than 35% smaller than the default value. (Note maximum decrease is 50% as parameters were randomly assigned a value between half and double the default value.)
[truncated: 52 more columns]

## Sheet: Results
	%change in mean value from normal run						NatP↑ Hsps↑	NatP↑ Hsps↑	NatP↑ Hsps↑	NatP↓ Hsps↓	NatP↓ Hsps↓	NatP↓ Hsps↓	NatP↔ Hsps↔	NatP↔ Hsps↔	NatP↔ Hsps↔	NatP↔ Hsps↔	< 10% Change in NatP, Hsps, MisP
Set no.	NatP	Total MisP	Free Hsp70	Free Hsp90	ROS		MisP↓ ROS↓	MisP↓ ROS↑	MisP↑ ROS↔	MisP↑ ROS↓	MisP↑ ROS↑	MisP↑ ROS↔	MisP↑ ROS↓	MisP↑ ROS↑	MisP↓ ROS↓	MisP↓ ROS↑	ROS↓
1	-8.8	52.1	-43.3	-46.4	-23.2					X
2	-1.5	22.3	-11.5	-3.4	-101.6								X
3	3.6	-104.1	15.4	6.2	-66.7		X
4	2.7	-33.7	4.3	3.4	-52.8		X
5	2.3	17.8	-8.3	-6.7	33									X
6	-23.5	61.6	-53.3	-65.3	43.1						X
7	7.3	-68.8	-0.9	6.5	-65.8		X
8	-1.6	-4.9	6.1	0.8	-18.6												X
9	-21.6	53	-45.2	-39.9	35.3						X
10	4.9	-78.4	11.2	9.2	12.2			X
11	9.6	-266	15.9	9.6	-34.3		X
12	-7.1	26.5	3.6	-0.4	25.7						X
13	-1	0.4	4.4	-7.2	-13												X
14	-7.4	34.8	-18	-7	3.6							X
15	5.7	-44.5	6.2	8	-9.8		X
16	-4.6	22.1	-6.5	-0.8	6.4						X
17	-34.1	64.4	-64.7	-63.7	53.9						X
18	0.9	-4.7	0.7	3.6	-55.2												X
19	-1.7	15	-1.9	-7.6	62						X
20	4.7	-28.7	9.5	7.7	-32		X
21	3.4	-43.9	1.8	11.2	-20.2		X
22	-10.1	43.5	-28.8	-26.6	22.5						X
23	-2.6	-32.4	7.6	7.9	-28.7										X
24	0.6	-4.2	-4.2	-5.2	-23.7												X
25	5.2	-46.7	3.7	1	-5.2		X
26	2.4	11.3	-1.1	-5.1	-42.7									X
27	-11.7	41.1	-7.1	-21.6	65.9						X
28	-9.9	48.8	-35.5	-25	65.1						X
29	3.5	-62.1	4.5	7.7	-76.6		X
30	-0.3	-20	-0.1	3.9	17.1											X
31	-8.6	52	-27.7	-38.6	10.8						X
32	4.6	-70.6	7.7	4.7	-94.1		X
33	3.8	-88.3	12.4	10.7	-176.7		X
34	2.5	-57.4	6.9	2.5	9			X
35	6.2	-165.4	12.7	2.6	-190.8		X
36	7	-43.5	11.3	9.7	4.5				X
37	1.5	-31.9	3.6	0	-100.8		X
38	-5.8	34	-3.4	-12	33.7						X
39	-4	18.6	-11.4	-3.9	28						X
40	-6.7	21.4	-1	-3.5	33.8						X
41	6	-40	9.7	7.8	-62.4		X
42	-40.7	70	-128.2	-119.2	66.5						X
43	2.8	-70.3	8.6	9.8	-172.7		X
44	6.3	-234.6	14.7	17.3	-57.3		X
45	-3.9	13.8	-3	-5.4	-12.8					X
46	1	-55.3	7.3	12.5	-31		X
47	3.5	-33.6	7.1	5.9	2				X
48	-8.5	46.9	-17.9	-23.2	31.3						X
49	2.2	-43.1	3.4	11.6	-70.6		X
50	8.8	-381.3	10.2	17.1	-191.6		X
							19	2	2	2	15	1	1	1	1	0	4
