# Supplementary material for: Modelling the Role of the Hsp70/Hsp90 System in the Maintenance of Protein Homeostasis
Source: PLoS One. 2011 Jul 14;6(7):e22038. doi: 10.1371/journal.pone.0022038 (PMC3137010; doi:10.1371/journal.pone.0022038)
Supplement: Table S2 — List of reactions. List of all the reactions in the model including kinetic rate laws and parameter values. (DOC) [file pone.0022038.s010.doc]

Table S2 List of Reactions

| No. | Reaction | Reactants and Products | Kinetic rate lawa | Value |
| --- | --- | --- | --- | --- |
| 1 | Protein synthesis | Source→ NatP | *ksynNatP* | 4.2E-2 molecule s-1 |
| 2 | Misfolding | NatP+ROS→ MisP+ROS | *kmisfold*<#NatP><#ROS> | 2.0E-6 molecule-1s-1 |
| 3 | Hsp70/MisP binding | Hsp70+MisP→ Hsp70_MisP | *kbinHspMisP* <#Hsp70><#MisP> | 8.0E-6 molecule-1 s-1 |
| 4 | Hsp70/MisP release | Hsp70_MisP→ Hsp70+MisP | *krelHspMisP* <#Hsp70_MisP> | 8.0E-5 s-1 |
| 5 | Hsp70 refolding | ATP+Hsp70_MisP→ ADP+Hsp70+NatP | *krefold* <#Hsp70_MisP>  <#ATP>/(5000+<#ATP>) | 5.5E-4 s-1 |
| 6 | Hsp90/MisP binding | Hsp90+MisP→ Hsp90_MisP | *kbinHspMisP* <#Hsp90><#MisP> | 2.0E-6 molecule-1 s-1 |
| 7 | Hsp90/MisP release | Hsp90_MisP→ Hsp90+MisP | *krelHspMisP* <#Hsp90_MisP> | 8.0E-5 s-1 |
| 8 | Hsp90 refolding | ATP+Hsp90_MisP→ ADP+Hsp90+NatP | *krefold* <#Hsp90_MisP>  <#ATP>/(5000+<#ATP>) | 5.5E-4 s-1 |
| 9 | Hsp70Client binding | Hsp70+Hsp70Client→ Hsp70_Hsp70Client | *kbinHsp70clien*t<#Hsp70>  <#Hsp70Client> | 2.0E-4 molecule-1 s-1 |
| 10 | Hsp70Client release | Hsp70_Hsp70Client→ Hsp70+Hsp70Client | *krelHsp70client*<#Hsp70_Hsp70Client> | 5.0 s-1 |
| 11 | Hsp90Client binding | Hsp90+Hsp90Client→ Hsp90_Hsp90Client | *kbinHsp90client* <#Hsp90>  <#Hsp90Client> | 2.0E-4 molecule-1 s-1 |
| 12 | Hsp90Client release | Hsp90_Hsp90Client→ Hsp90+Hsp90Client | *krelHsp90client* <#Hsp90_Hsp90Client> | 5.0 s-1 |
| 13 | Hsp90/Hsf1binding | Hsf1+Hsp90→ Hsf1_Hsp90 | *kbinHsf1Hsp90*<#Hsf1><#Hsp90> | 2.0E-2 |
| 14 | Hsp90/Hsf1release | Hsf1_Hsp90→ Hsf1+Hsp90 | *kreHsf1lHsp90*<#Hsf1_Hsp90> | 0.5 s-1 |
| 15 | Hsf1 dimerisation | 2Hsf1→ Hsf1_Hsf1 | *kdimerHsf1*<#Hsf1><#Hsf1-1>/2.0 | 8.0E-5 molecule-1 s-1 |
| 16 | Hsf1 de-dimerisation | Hsf1_Hsf1→2Hsf1 | *kdedimerHsf1*<#Hsf1_Hsf1> | 0.5 s-1 |
| 17 | Hsf1 trimerisation | Hsf1+Hsf1_Hsf1→ Hsf1_Hsf1_Hs1 | *ktrimerHsf1*<#Hsf1><#Hsf1_Hsf1> | 1.0E-2 molecule-1 s-1 |
| 18 | Hsf1 de-trimerisation | Hsf1_Hsf1_Hsf1→ Hsf1+Hsf1_Hsf1 | *kdetrimerHsf1*<# Hsf1_Hsf1_Hsf1> | 0.5 s-1 |
| 19 | Hsf1 trimer phosphorylation | Hsf1_Hsf1_Hsf1+Pkc→ Hsf1_Hsf1_Hsf1_P+Pkc | *kphosHsf1*<# Hsf1_Hsf1_Hsf1> <#Pkc> | 3.0E-2 molecule-1 s-1 |
| 20 | Hsf1 trimer de- phosphorylation | Hsf1_Hsf1_Hsf1_P+Hsp70_Ppx→ Hsf1_Hsf1_Hsf1+Hsp70_Ppx | *kdephosHsf1* <#Hsf1_Hsf1_Hsf1_P>  <#Hsp70_Ppx> | 1.0E-2 molecule-1 s-1 |
| 21 | HSEHsp70/Hsf1 trimer bindingb | HSEHsp70+Hsf1_Hsf1_Hsf1→ HSEHsp70_Hsf1_Hsf1_Hsf1 | *kbinHSEHsf1*<#HSEHsp70> <#Hsf1_Hsf1_Hsf1> | 5.0E-2 molecule-1 s-1 |
| 22 | HSEHsp70/Hsf1 trimer releaseb | HSEHsp70_Hsf1_Hsf1_Hsf1→ HSEHsp70+Hsf1_Hsf1_Hsf1 | *krelHSEHsf1*  <#HSEHsp70_Hsf1_Hsf1_Hsf1> | 8.0E-2 s-1 |
| 23 | HSEHsp70/Hsf1 phospho-trimer bindingb | HSEHsp70+ Hsf1_Hsf1_Hsf1_P→ HSEHsp70_Hsf1_Hsf1_Hsf1_P | *kbinHSEPhosTriH*<#HSEHsp70> <#Hsf1_Hsf1_Hsf1_P> | 0.1 molecule-1 s-1 |
| 24 | HSEHsp70/Hsf1 phospho-trimer releaseb | HSEHsp70_Hsf1_Hsf1_Hsf1_P→ HSEHsp70+Hsf1_Hsf1_Hsf1_P | *krelHSEPhosTriH* <#HSEHsp70_Hsf1_Hsf1_Hsf1_P> | 8.0E-2 s-1 |
| 25 | Hsp70 basal synthesisc | Source→ Hsp70 | *kbasalsynHsp70* | 8.0E-3 molecule s-1 |
| 26 | Hsp70 upregulationc | HSEHsp70_Hsf1_Hsf1_Hsf1_P→ HSEHsp70_Hsf1_Hsf1_Hsf1_P  +Hsp70 | *kupregHsp* <#HSEHsp70_Hsf1_Hsf1_Hsf1_P> | 0.2 s-1 |
| 27 | Hsp70 proteasome bindingd | Hsp70+Proteasome→ Hsp70_Proteasome | *kbinHsp70Prot*<#Hsp70><#Proteasome> | 1.2E-8 molecule-1 s-1 |
| 28 | Hsp70 degradationc | ATP+Hsp70_Proteasome→ ADP+Proteasome | *kdegHsp70*<#Hsp70_Proteasome> <#ATP>/(5000+<#ATP>) | 1.0E-2 s-1 |
| 29 | Hsp90 proteasome bindingd | Hsp90+Proteasome→ Hsp90_Proteasome | *kbinHsp90Prot*<#Hsp90><#Proteasome> | 1.0E-8 molecule-1 s-1 |
| 30 | Hsp70 damagec | Hsp70+ROS→ Hsp70_dam+ROS | *kdamHsp*<#Hsp70><#ROS> | 1.0E-8 s-1 |
| 31 | MisP proteasome bindingc | Hsp70_MisP+Proteasome→ Hsp70+MisP_ Proteasome | *kbinMisPProt* <#Hsp70_MisP><#Proteasome> | 1.0E-7 molecule-1 s-1 |
| 32 | MisP degradation | ATP+MisP_Proteasome→ ADP+Proteasome | *kdegMisp* <#MisP_Proteasome>  <#ATP>/(5000+<#ATP>) | 1.0E-2 s-1 |
| 33 | Hsp70/PPX binding | Hsp70+Ppx→ Hsp70_Ppx | *kbinHsp70Ppx<*#Hsp70><#Ppx> | 0.2 molecule-1 s-1 |
| 34 | Hsp70/PPX release | Hsp70_Ppx→ Hsp70+Ppx | *krelHsp70Ppx*<#Hsp70_Ppx> | 5.0 s-1 |
| 35 | Mkp1 synthesis | Source→Mkp1 | *ksynMkp1* | 1.0E-5 molecule s-1 |
| 36 | Mkp1 proteasome binding | Mkp1+Proteasome→ Mkp1_Proteasome | *kbinMkp1Prot<*#Mkp1>*<#*Proteasome*>* | 9.6E-9 molecule-1 s-1 |
| 37 | Mkp1 degradation | ATP+Mkp1_Proteasome→ ADP+Proteasome | *kdegMkp1*<#Mkp1_Proteasome> <#ATP>/(5000+<#ATP>) | 1.0E-2 s-1 |
| 38 | Mkp1 activation | Mkp1+Hsp70→Mkp1_P+Hsp70 | *kphosMkp1*<#Mkp1><#Hsp70> | 2.0E-2 molecule-1 s-1 |
| 39 | Mkp1 inactivation | Mkp1_P+ROS→Mkp1+ROS | *kdephosMkp1<*#Mkp1_P><#ROS> | 1.0E-3 s-1 |
| 40 | JNK phosphorylation | Jnk+ROS→ Jnk_P+ROS | *kphosJnk*<#Jnk><#ROS> | 2.0E-2 molecule-1 s-1 |
| 41 | JNK de-phosphorylation | Jnk_P+Mkp1_P→ Jnk+Mkp1_P | *kdephosJnkMkp1*<#Jnk_P><#Mkp1_P> | 5.0E-2 molecule-1 s-1 |
| 42 | p38 phosphorylation | p38+ROS→ p38_P+ROS | *kphosp38*<#p38><#ROS> | 2.0E-2 molecule-1 s-1 |
| 43 | p38 de-phosphorylation | p38_P+Mkp1_P→ p38+Mkp1_P | *kdephosp38Mkp1*<#p38_P><#Mkp1_P> | 5.0E-2 molecule-1 s-1 |
| 44 | p38 ROS production | p38_P→p38_P+ROS | *kgenROSp38*kp38act*<#p38_P> | 1.0E-4 s-1, 1.0 |
| 45 | Aggregatione | 2 MisP→AggP | *kagg*<#MisP><#MisP-1>/2.0 | 1.0E-8 molecule-1 s-1 |
| 46 | Inclusion formatione | MisP+AggP→SeqAggP | *kagg*<#MisP><#AggP> | 1.0E-8 molecule-1 s-1 |
| 47 | Inclusion growthe | MisP+SeqAggP→2SeqAggP | *kseqagg*<#MisP><#SeqAggP> | 7.0E-7 molecule-1 s-1 |
| 48 | Proteasome inhibition by aggregates | AggP+Proteasome→ AggP_Proteasome | *kbinAggPProt*<#AggP><#Proteasome> | 1.0E-5 molecule-1 s-1 |
| 49 | ROS generation | Source→ ROS | *kgenROS* | 1.0E-2 molecule s-1 |
| 50 | ROS removal | ROS→ Sink | *kremROS* <#ROS> | 1.0E-3 s-1 |
| 51 | ROS generation by aggregates1 | AggP→ AggP+ROS | *kgenROSAggP* <#AggP> | 1.0E-6 s-1 |
| 52 | ROS generation by aggregates2 | AggP_Proteasome→ AggP_Proteasome+ROS | *kgenROSAggP* <#AggP_Proteasome> | 1.0E-6 s-1 |
| 53 | Akt Synthesis | Source→ Akt | *ksynAkt* | 1.5E-3 molecule s-1 |
| 54 | Akt/Hsp90 binding | Akt+Hsp90→ Akt_Hsp90 | *kbinAktHsp90* <#Akt><#Hsp90> | 3.7E-4 molecule-1  s-1 |
| 55 | Akt/Hsp90 release | Akt_Hsp90→ Akt+Hsp90 | *krelAktHsp90* <#Akt_Hsp90> | 7.0 s-1 |
| 56 | Akt/CHIP binding | Akt_Hsp90+CHIP→ Akt_CHIP_Hsp90 | *kbinCHIP* <#Akt_Hsp90><#CHIP> | 2.0E-7molecule-1 s-1 |
| 57 | Akt/CHIP release | Akt_CHIP_Hsp90→ Akt_Hsp90+CHIP | *krelCHIP* <#Akt_CHIP_Hsp90> | 1.0E-8 s-1 |
| 58 | Akt Proteasome binding | Akt_CHIP_Hsp90+Proteasome→ Akt_Proteasome+CHIP+ Hsp90 | *kbinAktProt* <#Akt_CHIP_Hsp90>  <#Proteasome> | 6.0E-8 molecule-1 s-1 |
| 59 | Akt/Proteasome release | Akt_Proteasome→ Akt+Proteasome | *krelAktProt* <#Akt_Proteasome> | 1.0E-8 s-1 |
| 60 | Akt Degradation | Akt_Proteasome+ATP→ Proteasome+ADP | *kdegAkt* <#Akt_Proteasome>  <#ATP>/(5000+<#ATP>) | 1.0E-2 s-1 |
| 61 | p38 cell death | p38_P→p38_P+p38Death  +CellDeathf | *kp38death* * *kp38act*<#p38_P> | 1.5E-7 s-1, 1.0 |
| 62 | JNK cell death | Jnk_P→Jnk_P+JNKDeath+ CellDeathf | *kJnkdeath*<#Jnk_P> | 1.5E-7 s-1 |
| 63 | PI cell death | AggP_Proteasome→ AggP_Proteasome+PIDeath+ CellDeathf | *kPIdeath*<#AggP_Proteasome> | 2.0E-8 s-1 |

a All reactions contain parameter *kalive* which is initially set to 1.0. bIdentical reaction takes place for HSEHsp90 with same value for the kinetic parameter. cIdentical reaction takes place for Hsp90 with same value for the kinetic parameter. dIdentical reactions occur for Hsp70_dam and Hsp90_dam. eIdentical reactions occur for Hsp70_dam and Hsp90_dam as for MisP with same value for the kinetic parameters. fCellDeath is a dummy species which is required for the event DeathOfCell (Table 2).
